# Supplementary material
Source: publisher figshare collection journal article supplement (https://gsapubs.figshare.com/ndownloader/files/23294114)

## **Spotila, 2012: Data Repository**

### **Methods**

Figure DR-1 (a-d) illustrates conceptually how divide elevation depends on the geometry of intersecting ridges. Ridgeline slope depends on both hillside gradient and the obliquity of opposing hillside trends. The simple relationship between ridgeline slope and hillside obliquity for varying hillside gradients (Fig. DR-1c) is based on the simplifying assumption of planar hillsides, although natural hillsides generally exhibit curvature in 3D. The height, shape, and dynamic evolution of ridgelines will also depend on the competition of relative advance of opposing hillsides (Fig. DR-1d).

In the global survey, groups of peaks worldwide were screened using *GoogleEarth*. Peaks were selected based on regional hierarchies (i.e. top highest peaks in a given area), such as the top 100 peaks in the world (Table 1). The peaks screened are listed in Table DR-1 (n=255), along with location coordinates. The locations span a range of erosional (glacial and fluvial), climatic (arid to humid), and tectonic (erosion and uplift rates) settings. Lists of top peaks in different areas were based on various websites, primarily including Wikipedia and PeakBagger:

[http://en.wikipedia.org/wiki/List\\_of\\_highest\\_mountains](http://en.wikipedia.org/wiki/List_of_highest_mountains)

<http://www.peakbagger.com/ListIndx.aspx>

Although these are un-refereed internet sources, all coordinates of peaks listed were checked and the elevation verified using *GoogleEarth*. Minor errors in these lists, such as missing peaks or specific values of prominence, cannot be completely ruled out.

However, the intention of using these regional hierarchies was to eliminate bias in which peaks were selected for inspection in the global survey. All peaks in these lists were

screened and included in Table DR-1, regardless of appearance, and all peaks in these lists are significant, prominent peaks in their respective areas. Note that peak prominence is defined as the height of a peak above the lowest contour that encircles it and nothing higher (Fig. DR-1e). Prominence is typically set at ~5-10% of the total local relief of a range (e.g. ~500 m in the high Himalaya; Table 1), such that many high peaks may not be included in the list because they are too close in elevation to a nearby higher peak. Figure DR-1f shows a comparison of a parabolic ridge with only one prominent peak relative to a ridge with lower saddles that yields many more prominent peaks. As an aside, the frequency of prominent peaks per area may actually be an interesting metric for comparison of mountain topography.

Peaks were screened using unexaggerated 3D visualization of digital topography (on a template combining satellite imagery) using *GoogleEarth* at a uniform scale of approximately 1:10,000. *GoogleEarth* uses a variety of elevation data, ranging from 10 m to 90 m resolution (SRTM data). In most mountain ranges examined, the resolution was 10 m or 30 m. Regardless of the DEM resolution, however, the *GoogleEarth* was adequate for identifying ridges shorter than ~0.5 km at all locations at 1:10,000 scale. Spatial variation in DEM resolution should thus not affect the results of the global survey. Peaks located within 0.2 km of divide intersections were classified as divide-junction peaks (Fig. DR-2). The contributing divides had to be a minimum of ~0.5 km long and separate tributary valleys by at least 1 km. This threshold was designed to include divides that separate first-order drainages, but to exclude minor rill-like crenulations along hillsides within individual basins. An additional criteria was that divide-junction peaks had to appear with three (or more) hillside faces that clearly drain

into separate basins with clear concave contours. Examples of peaks that were classified as ridge-only (vs. divide-junction) based on this criteria are shown in Fig. DR-3.

Most divide-junction peaks consist of divide triple junctions, although a significant fraction of quadruple junctions also occur (Table DR-1). The minimum lengths of contributing divides were measured in map view for each location (Table DR-1). Since the goal of the survey was to identify peaks that have at least three intersecting divides, the third-shortest contributing divide was measured for all divide junctions (i.e. not the absolute minimum on quadruple junctions). The distribution of these third-shortest divide lengths shows that 3/4 of the divide-junction peaks are made by divides that exceed 3 km length (Fig. 2). Where the shortest-contributing divide length exceeds 5-10 km, length measurements may be ambiguous due to the possibility of taking multiple paths off of the divide network (Figure DR-1g).

The relationship between peak and divide-junction locations was also tested at the local scale. Ten primarily glacial and fluvial areas of rugged topography were selected for examination of drainage divide structure in map and/or profile view (Table DR-2; Fig. DR-4, DR-5). Note that some of the glacial areas are now deglaciated, but exhibit topography that is characteristically glacial. Similarly, the highest elevations of some of the fluvial areas may have experienced minor glacial or periglacial influence during the last glacial maximum (e.g. the Atlas Mountains), but the topography of these ranges is dominantly fluvial. The areas mapped exclude volcanic terrain, low-relief areas, and high-relief areas that exhibit interfluves with relict surfaces. Sources for the long-term denudation rates reported for these areas are provided in Table DR-2. Results of profile and map-view analysis are presented in Tables DR-3 and DR-4.

Divide maps were constructed using shaded relief images from *GoogleMaps*. All maps were shaded from the northwest and mapped at 1:200,000 scale on a graphical interface. Divides were easy to identify using this interface, given that side illumination highlights most ridges as white lines. Given that ridges and divides exhibit semi-fractal distributions and that the resolution of DEMs may vary by location, a mapping threshold of minimum ridge size was employed; only divides >5 km long and separated by >3 km (i.e. valley spacing) were mapped. Mapped ridges also had to have significant relief from hillsides and separate clearly-developed basins with curved contours. This criteria made mapping of ridges somewhat subjective, but was used to screen out topographic crenulations along individual hillsides that do not separate first or higher order basins. Divide junctions were mapped for each area based on the mapped ridge networks. Where two triple junctions came within ~1 km of each other, they were combined into a quadruple junction. Various statistics of the occurrence of divide junctions and total divide length per mapped area are reported in Table DR-4. When counting divide junctions in each area, quadruple junctions were counted twice (given that each is equivalent to 2 triple junctions joined together).

Five glacial and fluvial areas were selected for ridge profile analysis (Table DR-3, Fig. DR-5). Ridge profiles were constructed using *GoogleEarth* in the same geographic interface as the global peak survey, but at a uniform scale of ~1:20,000. Elevations were sampled at approximately 1-km spacing, so that only significant peaks and undulations are represented. This spacing was selected to reduce data volume, given that the profiles would eventually be analyzed at small scale only. The elevations of all divide junctions were also directly sampled. Ridge profiles follow the irregular trace of ridges in map

view and include all ridges in a connected ridge network using the criteria listed above for ridge maps. Profiles generally cover 80-km-long primary ridges, and thus do not cover the entire area of each map. In some cases, profiles stop abruptly mid-ridge, because a profile was stopped after a representative length had been obtained. Secondary ridges are plotted as extending in either the positive or negative x-direction depending on the orientation of the primary ridge and the side from which the secondary ridge joins (Fig. DR-5). Several ridge profiles were constructed using 1:250,000 topographic maps (Chugach, St. Elias, Smoky Mtns., San Gabriel Mountains), but corrected for the same pattern of ridges as the *GoogleEarth* profiles. Once completed, divide junctions were identified and compared to peak locations. The divide junctions on profiles are identical to those on the maps of the same area, given that they share defining criteria. Peaks were defined as any positive relief form, regardless of prominence. The slope of primary ridges was calculated between each elevation spacing and thus has a wavelength of 1 km and may miss slight undulations. The topographic roughness was measured in two ways;  $\Psi_1$  is the horizontal ridge length divided by the total ridge length in profile (i.e. akin to sinuosity, but measured in profile at 8x exaggeration), and  $\Psi_2$  is the normalized distance of the ridge profile over which 50% of the profile's relief is obtained.

This study was made possible by the easily-used geographic tools provided by *Google*. *GoogleEarth* and *GoogleMaps* enable instant access to global topography, without having to download and process numerous individual patches of DEMs. Although the association of peaks and ridge junctions has previously been observed (Gilbert, 1880; Twidale, 1976; Gonzalez, 2003), recognition of the influence of drainage divide structure on peaks required the advent of easily accessible digital topography.

**Table DR-1: Global survey of peaks.**

**GROUP 1: Top-100 peaks in the world (500 m prominence), all of which are above the glacial limit.**

| Rank | Name               | Elev. (m) | Region     | Location              | Shortest Ridge | Peak type            |
|------|--------------------|-----------|------------|-----------------------|----------------|----------------------|
| 1    | Everest            | 8848      | Himalaya   | 27.9881 N, 86.9253 E  | 5.2            | triple               |
| 2    | K2                 | 8611      | Karakoram  | 35.8814 N, 76.5133 E  | 6.5            | five-sided tower     |
| 3    | Kangchenjunga      | 8586      | Himalaya   | 27.7033 N, 88.1475 E  | 15.3           | triple               |
| 4    | Lhotse             | 8516      | Himalaya   | 27.9617 N, 86.9331 E  | 9.6            | triple               |
| 5    | Makalu             | 8485      | Himalaya   | 27.8897 N, 87.0889 E  | 8.0            | triple               |
| 6    | Cho Oyu            | 8188      | Himalaya   | 28.0942 N, 86.6608 E  | 3.3            | triple, almost quad. |
| 7    | Dhaulagiri         | 8167      | Himalaya   | 28.6967 N, 83.4931 E  | 16.6           | quad.                |
| 8    | Manaslu            | 8163      | Himalaya   | 28.5500 N, 84.5597 E  | 5.5            | triple               |
| 9    | Nanga Parbat       | 8126      | Himalaya   | 35.2372 N, 74.5892 E  | 0.9            | triple               |
| 10   | Annapurna I        | 8091      | Himalaya   | 28.5956 N, 83.8203 E  | 4.6            | triple               |
| 11   | Gasherrum I        | 8080      | Karakoram  | 35.7244 N, 76.6964 E  | 8.7            | triple               |
| 12   | Broad Peak         | 8051      | Karakoram  | 35.8106 N, 76.5683 E  |                | ridge only           |
| 13   | Gasherbrum II      | 8034      | Karakoram  | 35.7578 N, 76.6533 E  |                | ridge only           |
| 14   | Shishapangma       | 8027      | Himalaya   | 28.3533 N, 85.7786 E  | 1.3            | triple               |
| 15   | Gyachung Kang      | 7952      | Himalaya   | 28.0981 N, 86.7450 E  | 5.3            | triple               |
| 16   | Annapurna II       | 7937      | Himalaya   | 28.5347 N, 84.1219 E  | 3.5            | triple               |
| 17   | Gasherbrum IV      | 7932      | Karakoram  | 35.7606 N, 76.6161 E  | 9.6            | triple               |
| 18   | Himalchuli         | 7893      | Himalaya   | 28.4367 N, 84.6397 E  | 23.5           | triple               |
| 19   | Distaghil Sar      | 7884      | Karakoram  | 36.3258 N, 75.1878 E  | 28.9           | triple               |
| 20   | Ngadi Chuli        | 7871      | Himalaya   | 28.5033 N, 84.5667 E  | 1.4            | triple               |
| 21   | Nuptse             | 7864      | Himalaya   | 27.9675 N, 86.8869 E  | 0.8            | triple               |
| 22   | Khunyang Chhish    | 7823      | Karakoram  | 36.2053 N, 75.2078 E  | 6.6            | quad.                |
| 23   | Masherbrum         | 7821      | Karakoram  | 35.6411 N, 76.3058 E  | 6.8            | quad.                |
| 24   | Nanda Devi         | 7816      | Himalaya   | 30.3758 N, 79.9708 E  | 1.6            | triple               |
| 25   | Chomo Lonzo        | 7804      | Himalaya   | 27.9306 N, 87.1078 E  | 4.5            | triple, almost quad. |
| 26   | Batura Sar         | 7795      | Karakoram  | 36.5103 N, 74.5225 E  |                | ridge only           |
| 27   | Kanjut Sar         | 7790      | Karakoram  | 36.2056 N, 75.4169 E  | 15.1           | five-sided tower     |
| 28   | Rakaposhi          | 7788      | Karakoram  | 36.1425 N, 74.4894 E  | 17.7           | triple               |
| 29   | Namche Barwa       | 7782      | Himalaya   | 29.6311 N, 95.0553 E  | 23.2           | triple               |
| 30   | Kamet              | 7756      | Himalaya   | 30.9200 N, 79.5917 E  | 3.5            | triple               |
| 31   | Dhaulagiri II      | 7751      | Himalaya   | 28.7628 N, 83.3883 E  | 14.1           | triple               |
| 32   | Saltoro Kangri     | 7742      | Karakoram  | 35.3992 N, 76.8481 E  | 3.4            | quad.                |
| 33   | Jannu              | 7711      | Himalaya   | 27.6822 N, 88.0444 E  | 1.6            | triple               |
| 34   | Tirich Mir         | 7708      | Hindu Kush | 36.2553 N, 71.8417 E  | 11.8           | triple               |
| 35   | Molamengqing       | 7703      | Himalaya   | 28.3550 N, 85.8097 E  | 2.6            | quad.                |
| 36   | Gurla Mandhata     | 7694      | Himalaya   | 30.4386 N, 81.2967 E  | 12.8           | triple               |
| 37   | Saser Kangri I     | 7672      | Karakoram  | 34.8667 N, 77.7525 E  | 23.4           | triple               |
| 38   | Chogolisa          | 7665      | Karakoram  | 35.6131 N, 76.5747 E  | 3.6            | triple               |
| 39   | Kongur Tagh        | 7649      | Kunlun     | 38.5933 N, 75.3133 E  | 1.6            | triple               |
| 40   | Dhaulagiri V       | 7618      | Himalaya   | 28.7339 N, 83.3614 E  | 10.9           | triple               |
| 41   | Shispare           | 7611      | Karakoram  | 36.4406 N, 74.6808 E  | 17.2           | quad.                |
| 42   | Trivor             | 7577      | Karakoram  | 36.2875 N, 75.0850 E  | 6.1            | triple               |
| 43   | Gangkhar Puensum   | 7570      | Himalaya   | 28.0472 N, 90.4553 E  | 5.3            | triple               |
| 44   | Gongga Shan        | 7556      | Daxue Shan | 29.5953 N, 101.8797 E | 22.0           | quad.                |
| 45   | Annapurna III      | 7555      | Himalaya   | 28.5850 N, 83.9900 E  | 37.4           | triple               |
| 46   | Muztagh Ata        | 7546      | Kunlun     | 38.2758 N, 75.1161 E  | 7.7            | quad.                |
| 47   | Skyang Kangri      | 7545      | Himalaya   | 35.9264 N, 76.5675 E  | 1.0            | triple               |
| 48   | Changtse           | 7543      | Himalaya   | 28.0247 N, 86.9142 E  | 5.0            | quad.                |
| 49   | Kula Kangri        | 7538      | Himalaya   | 28.2269 N, 90.6164 E  | 7.3            | triple               |
| 50   | Kongur Tiube       | 7530      | Kunlun     | 38.6158 N, 75.1958 E  | 9.5            | triple               |
| 51   | Mamostong Kangri   | 7516      | Karakoram  | 35.1419 N, 77.5775 E  | 2.0            | triple               |
| 52   | Saser Kangri II    | 7513      | Karakoram  | 34.8047 N, 77.8067 E  | 4.8            | triple               |
| 53   | Ismail Sarmani     | 7495      | Pamir      | 38.9431 N, 72.0158 E  | 16.0           | triple               |
| 54   | Saser Kangri       | 7495      | Karakoram  | 34.8456 N, 77.7850 E  |                | ridge only (cone)    |
| 55   | Noshaq             | 7492      | Hindu Kush | 36.4322 N, 71.8286 E  |                | ridge only           |
| 56   | Pumari Chhish      | 7492      | Karakoram  | 36.2114 N, 75.2503 E  | 1.4            | triple               |
| 57   | PaGu Sar           | 7476      | Karakoram  | 36.4878 N, 74.5878 E  | 13.7           | triple               |
| 58   | Yukshin Gardan Sar | 7469      | Karakoram  | 36.2511 N, 75.3747 E  | 2.1            | triple               |
| 59   | Teram Kangri I     | 7462      | Karakoram  | 35.5800 N, 77.0783 E  |                | ridge only           |
| 60   | Jongsong Peak      | 7462      | Himalaya   | 27.8817 N, 88.1358 E  | 30.0           | triple               |
| 61   | Malubiting         | 7458      | Karakoram  | 36.0033 N, 74.8753 E  | 13.6           | triple               |
| 62   | Gangapurna         | 7455      | Himalaya   | 28.6050 N, 83.9636 E  | 4.5            | triple               |
| 63   | Jengish Chokusu    | 7439      | Tian Shan  | 42.0347 N, 80.1297 E  | 30.0           | triple               |
| 64   | K12                | 7428      | Karakoram  | 35.2958 N, 77.0222 E  | 10.3           | triple               |
| 65   | Yangra             | 7422      | Himalaya   | 28.3914 N, 85.1272 E  | 26.4           | triple               |
| 66   | Sia Kangri         | 7422      | Karakoram  | 35.6633 N, 76.7617 E  | 3.5            | triple               |
| 67   | Momhil Sar         | 7414      | Karakoram  | 36.3178 N, 75.0364 E  | 10.1           | triple               |
| 68   | Kabru N            | 7412      | Himalaya   | 27.6339 N, 88.1167 E  | 3.7            | triple               |

|     |                     |      |            |                      |      |                |
|-----|---------------------|------|------------|----------------------|------|----------------|
| 69  | Skil Brum           | 7410 | Karakoram  | 35.8508 N, 76.4286 E | 14.9 | quad.          |
| 70  | Haramosh            | 7409 | Karakoram  | 35.8400 N, 74.8975 E | 10.9 | triple         |
| 71  | Istor-o-Nal         | 7403 | Hindu Kush | 36.3756 N, 71.8983 E | 2.1  | triple, nested |
| 72  | Ghent Kangri        | 7401 | Karakoram  | 35.5178 N, 76.8006 E | 12.6 | triple         |
| 73  | Ultrar Sar          | 7388 | Karakoram  | 36.3908 N, 74.7167 E | 5.6  | triple         |
| 74  | Rimo I              | 7385 | Karakoram  | 35.3550 N, 77.3689 E | 5.0  | triple         |
| 75  | Churen Himal        | 7385 | Himalaya   | 28.7347 N, 83.2175 E | 0.6  | triple         |
| 76  | Teram Kangri III    | 7382 | Karakoram  | 35.5997 N, 77.0481 E | 3.9  | quad.          |
| 77  | Sherpi Kangri       | 7380 | Karakoram  | 35.4661 N, 76.7814 E | 2.5  | triple         |
| 78  | Labuche Kang        | 7367 | Himalaya   | 28.3042 N, 86.3508 E | 9.2  | triple         |
| 79  | Kirat Chuli         | 7362 | Himalaya   | 27.7878 N, 88.1953 E | 3.9  | triple         |
| 80  | Abi Gamin           | 7355 | Himalaya   | 30.9325 N, 79.6025 E | 11.9 | quad.          |
| 81  | Nangpai Gosum       | 7350 | Himalaya   | 28.0733 N, 86.6142 E | 7.0  | triple         |
| 82  | Saraghrar           | 7349 | Hindu Kush | 36.5475 N, 72.1150 E | 4.3  | triple, nested |
| 83  | Chamlang            | 7321 | Himalaya   | 27.7750 N, 86.9797 E | 3.5  | triple         |
| 84  | Chongtar            | 7315 | Karakoram  | 35.9153 N, 76.4292 E | 6.8  | quad., nested  |
| 85  | Baltoro Kangri      | 7312 | Karakoram  | 35.6392 N, 76.6733 E | 2.1  | triple         |
| 86  | Siguang Ri          | 7309 | Himalaya   | 28.1472 N, 86.6850 E | 6.5  | triple         |
| 87  | The Crown           | 7295 | Karakoram  | 36.1067 N, 76.2058 E | 1.2  | quad. (cone)   |
| 88  | Gyala Peri          | 7294 | Himalaya   | 29.8144 N, 94.9686 E | 6.8  | triple         |
| 89  | Porong Ri           | 7292 | Himalaya   | 28.3894 N, 85.7200 E |      | ridge only     |
| 90  | Baintha Brakk       | 7285 | Karakoram  | 35.9475 N, 75.7533 E |      | ridge only     |
| 91  | Yutmaru Sar         | 7283 | Karakoram  | 36.2264 N, 75.3672 E | 5.1  | triple         |
| 92  | Baltistan Peak (K6) | 7282 | Karakoram  | 35.4183 N, 76.5517 E | 23.7 | triple         |
| 93  | Kangpenqing         | 7281 | Himalaya   | 28.5508 N, 85.5456 E |      | ridge only     |
| 94  | Muztagh Tower       | 7276 | Karakoram  | 35.8278 N, 76.3611 E |      | ridge only     |
| 95  | Diran               | 7266 | Karakoram  | 36.1203 N, 74.6617 E | 20.4 | quad.          |
| 96  | Labuche Kang III    | 7250 | Himalaya   | 28.3014 N, 86.3839 E | 11.5 | triple         |
| 97  | Putha Hiunchuli     | 7246 | Himalaya   | 28.7478 N, 83.1461 E | 24.0 | quad.          |
| 98  | Apsarasas Kangri    | 7245 | Karakoram  | 35.5386 N, 77.1486 E | 4.5  | triple         |
| 99  | Rimo III            | 7233 | Karakoram  | 35.3753 N, 77.3617 E | 3.7  | triple         |
| 100 | Langtan Lirung      | 7227 | Himalaya   | 28.2561 N, 85.5169 E | 5.1  | triple         |

# of ridge-only peaks = 10. Triple/quad peaks = 90%

**GROUP 2: 50 highest peaks in North America (500 m prominence), all of which are or have been glaciated.**

| Rank | Name             | Elev. (m) | Region                  | Location              | Shortest Ridge | Peak type        |
|------|------------------|-----------|-------------------------|-----------------------|----------------|------------------|
| 1    | Mt. McKinley     | 6194      | Alaska Range            | 63.0690 N, 151.0063 W | 19.1           | triple           |
| 2    | Mt. Logan        | 5956      | St. Elias Range         | 60.5666 N, 140.4072 W | 11.2           | triple           |
| 3    | Citlaltépetl     | 5635      | Mexico                  | 19.0305 N, 97.2698 W  |                | volcano          |
| 4    | Mt. St. Elias    | 5489      | St. Elias Range         | 60.2927 N, 140.9307 W | 17.4           | quad.            |
| 5    | Pococatepetl     | 5410      | Mexico                  | 19.0225 N, 98.6278 W  |                | volcano          |
| 6    | Mt. Foraker      | 5304      | Alaska Range            | 62.9605 N, 151.3992 W | 14.8           | quad.            |
| 7    | Mt. Lucania      | 5260      | St. Elias Range         | 61.0215 N, 140.4661 W | 10.5           | triple           |
| 8    | Iztaccihuatl     | 5230      | Mexico                  | 19.1792 N, 98.6419 W  |                | volcano          |
| 9    | King Peak        | 5173      | St. Elias Range         | 60.5834 N, 140.6561 W | 8.8            | triple           |
| 10   | Mt. Bona         | 5044      | St. Elias Range         | 61.3845 N, 141.7529 W | 32.9           | triple           |
| 11   | Mt. Steele       | 5020      | St. Elias Range         | 61.0929 N, 140.3118 W | 15.4           | quad.            |
| 12   | Mt. Blackburn    | 4996      | Wrangell Mtns.          | 61.7305 N, 143.4031 W | 11.7           | volcano (eroded) |
| 13   | Mt. Sanford      | 4949      | Wrangell Mtns.          | 62.2132 N, 144.1292 W |                | volcano          |
| 14   | Mt. Wood         | 4860      | St. Elias Range         | 61.2323 N, 140.5139 W | 7.9            | triple           |
| 15   | Mt. Vancouver    | 4812      | St. Elias Range         | 60.3589 N, 139.6980 W | 9.0            | triple           |
| 16   | Mt. Slaggard     | 4742      | St. Elias Range         | 61.1723 N, 140.5869 W | 22.4           | triple           |
| 17   | Nevado de Toluca | 4690      | Mexico                  | 19.1020 N, 99.7676 W  |                | volcano          |
| 18   | Mt. Fairweather  | 4671      | St. Elias Range         | 58.9064 N, 137.5265 W | 13.5           | triple           |
| 19   | Mt. Hubbard      | 4557      | St. Elias Range         | 60.3189 N, 139.0719 W | 6.6            | triple           |
| 20   | Mt. Bear         | 4520      | St. Elias Range         | 61.2834 N, 141.1433 W | 7.4            | triple           |
| 21   | Mt. Walsh        | 4506      | St. Elias Range         | 61.0034 N, 140.0172 W | 3.2            | triple           |
| 22   | Mt. Hunter       | 4442      | Alaska Range            | 62.9496 N, 151.0921 W | 6.4            | triple           |
| 23   | Matlalcueytl     | 4430      | Mexico                  | 19.2302 N, 98.0316 W  |                | volcano          |
| 24   | Mt. Whitney      | 4421      | Sierra Nevada           | 36.5786 N, 118.2920 W | 1.2            | quad.            |
| 25   | Mt. Alverstone   | 4420      | St. Elias Range         | 60.3519 N, 139.0752 W | 33.1           | triple           |
| 26   | University Peak  | 4410      | St. Elias Range         | 61.3272 N, 141.7867 W | 3.6            | triple           |
| 27   | Mt. Elbert       | 4401      | Sawatch R., CO          | 39.1178 N, 106.4454 W | 4.2            | triple           |
| 28   | Mt. Massive      | 4398      | Sawatch R., CO          | 39.1875 N, 106.4757 W | 2.5            | triple           |
| 29   | Mt. Harvard      | 4397      | Collegiate Pks., CO     | 38.9244 N, 106.3207 W | 2.8            | triple           |
| 30   | Mt. Ranier       | 4394      | Cascade Range           | 46.8521 N, 121.7579 W |                | volcano          |
| 31   | Mt. Williamson   | 4386      | Sierra Nevada           | 36.6559 N, 118.3111 W | 8.3            | quad.            |
| 32   | McArthur Peak    | 4380      | St. Elias Range         | 60.6061 N, 140.2160 W | 4.1            | triple           |
| 33   | La Plata Peak    | 4379      | Collegiate Pks., CO     | 39.0294 N, 106.4729 W | 3.2            | triple           |
| 34   | Blanca Peak      | 4374      | Sangre de Cristo R., CO | 37.5775 N, 105.4857 W | 6.6            | quad.            |
| 35   | Uncompahgre Peak | 4365      | San Juan R., CO         | 38.0717 N, 107.4621 W | 0.9            | triple           |



| 36                                                                                                   | Creston Peak       | 4359      | Sangre de Cristo, CO    | 37.9668 N, 105.5855 W | 6.0            | quad.                |
|------------------------------------------------------------------------------------------------------|--------------------|-----------|-------------------------|-----------------------|----------------|----------------------|
| 37                                                                                                   | Mt. Lincoln        | 4357      | Mosquito R., CO         | 39.3515 N, 106.1116 W | 2.0            | triple               |
| 38                                                                                                   | Castle Peak        | 4352      | Elk Mtns., CO           | 39.0097 N, 106.8614 W | 12.4           | quad.                |
| 39                                                                                                   | Grays Peak         | 4352      | Front R., CO            | 39.6339 N, 105.8176 W | 4.4            | quad.                |
| 40                                                                                                   | Mt. Antero         | 4351      | Sawatch R., CO          | 38.6741 N, 106.2462 W | 4.2            | triple               |
| 41                                                                                                   | Mt. Evans          | 4348      | Front R., CO            | 39.5883 N, 105.6438 W | 0.8            | triple               |
| 42                                                                                                   | Longs Peak         | 4346      | Front R., CO            | 40.2550 N, 105.6151 W | 5.5            | triple               |
| 43                                                                                                   | Mt. Wilson         | 4344      | San Miguel Mtns., CO    | 37.8391 N, 107.9916 W | 3.6            | quad.                |
| 44                                                                                                   | White Mountain Pk. | 4344      | White Mtns., CA         | 37.6341 N, 118.2557 W | 9.9            | triple               |
| 45                                                                                                   | North Palisade     | 4343      | Sierra Nevada, CA       | 37.0943 N, 118.5147 W |                | ridge only           |
| 46                                                                                                   | Mt. Princeton      | 4329      | Collegiate Pks., CO     | 38.7492 N, 106.2424 W | 4.2            | triple               |
| 47                                                                                                   | Mt. Yale           | 4329      | Collegiate Pks., CO     | 38.8442 N, 106.3138 W | 3.9            | triple               |
| 48                                                                                                   | Mt. Shasta         | 4322      | Cascade Range, CA       | 41.4092 N, 122.1949 W |                | volcano              |
| 49                                                                                                   | Maroon Pk.         | 4317      | Elk Mtns., CO           | 39.0708 N, 106.9890 W | 20.3           |                      |
| 50                                                                                                   | Mt. Wrangell       | 4317      | Wrangell Mtns.          | 62.0059 N, 144.0187 W |                | volcano              |
| <b>9 peaks are constructional; 1 peak is ridge-only. Triple/quad = 98%.</b>                          |                    |           |                         |                       |                |                      |
| <b>GROUP 3: Top 20 peaks of European Alps (~100 m prominence); all are above the glacial limit</b>   |                    |           |                         |                       |                |                      |
| Rank                                                                                                 | Name               | Elev. (m) | Region                  | Location              | Shortest Ridge | Peak type            |
| 1                                                                                                    | Mont Blanc         | 4808      | Alps                    | 45.8336 N, 6.8650 E   | 4.7            | triple               |
| 2                                                                                                    | Monte Rosa         | 4634      | Alps                    | 45.9368 N, 7.8671 E   | 2.3            | triple               |
| 3                                                                                                    | Zumsteinspitze     | 4563      | Alps                    | 45.9319 N, 7.8714 E   | 1.2            | triple               |
| 4                                                                                                    | Dom                | 4545      | Alps                    | 46.0950 N, 7.8600 E   | 3.7            | quad.                |
| 5                                                                                                    | Liskamm            | 4527      | Alps                    | 45.9225 N, 7.8356 E   | 2.9            | triple               |
| 6                                                                                                    | Weissshorn         | 4506      | Alps                    | 46.1017 N, 7.7161 E   | 4.5            | triple               |
| 7                                                                                                    | Matterhorn         | 4478      | Alps                    | 45.9764 N, 7.6583 E   | 4.2            | quad.                |
| 8                                                                                                    | Dent Blanche       | 4356      | Alps                    | 46.0342 N, 7.6119 E   | 29.8           | quad.                |
| 9                                                                                                    | Nadelhorn          | 4327      | Alps                    | 46.1088 N, 7.8642 E   | 7.3            | triple               |
| 10                                                                                                   | Grand Combin       | 4314      | Alps                    | 45.9375 N, 7.2992 E   | 12.5           | triple               |
| 11                                                                                                   | Lenzspitze         | 4294      | Alps                    | 46.1046 N, 7.8684 E   | 3.0            | triple               |
| 12                                                                                                   | Finsteraarhorn     | 4274      | Alps                    | 46.5375 N, 8.1260 E   | 1.7            | triple               |
| 13                                                                                                   | Zinalrothorn       | 4221      | Alps                    | 46.0647 N, 7.6900 E   | 7.4            | quad.                |
| 14                                                                                                   | Grandes Jorasses   | 4208      | Alps                    | 45.8689 N, 6.9881 E   | 2.5            | triple               |
| 15                                                                                                   | Alphubel           | 4206      | Alps                    | 46.0629 N, 7.8639 E   | 1.2            | triple               |
| 16                                                                                                   | Rimpfischhorn      | 4199      | Alps                    | 46.0231 N, 7.8839 E   | 0.5            | triple               |
| 17                                                                                                   | Strahlhorn         | 4190      | Alps                    | 46.0132 N, 7.9018 E   | 3.7            | quad.                |
| 18                                                                                                   | Dent d'Herens      | 4171      | Alps                    | 45.9701 N, 7.6051 E   |                | ridge only           |
| 19                                                                                                   | Breithorn          | 4164      | Alps                    | 45.9411 N, 7.7472 E   | 1.1            | triple               |
| 20                                                                                                   | Jungfrau           | 4158      | Alps                    | 46.5368 N, 7.9626 E   | 4.0            | triple               |
| <b># of ridge-only peaks = 1. Triple/quad peaks = 95%</b>                                            |                    |           |                         |                       |                |                      |
| <b>GROUP 4: Highest non-volcanic peaks of countries/Islands of SE Asia and Pacific; all fluvial.</b> |                    |           |                         |                       |                |                      |
| Rank                                                                                                 | Name               | Elev. (m) | Region                  | Location              | Shortest Ridge | Peak type            |
| 1                                                                                                    | Mt. Wilhelm        | 4509      | Papua NG                | 5.8000 S, 145.0333 E  | 7.8            | quad.                |
| 2                                                                                                    | Gunung Kinabalu    | 4095      | Borneo                  | 6.0724 N, 116.5616 E  |                | ridge only (rounded) |
| 3                                                                                                    | Yushan             | 3952      | Taiwan                  | 23.4700 N, 120.9573 E | 9.1            | quad.                |
| 4                                                                                                    | Phou Bia           | 2819      | Laos                    | 18.9796 N, 103.1515 E | 10.4           | quad.                |
| 5                                                                                                    | Jirisan            | 1915      | South Korea (mainland)  | 35.3370 N, 127.7167 E | 3.8            | triple               |
| 6                                                                                                    | Hokusuihaku-san    | 2522      | North Korea (non-volc.) | 40.7105 N, 127.7505 E | 8.5            | triple               |
| 7                                                                                                    | Doi Inthanon       | 2565      | Thailand                | 18.5922 N, 98.4867 E  | 5.3            | triple (but rounded) |
| 8                                                                                                    | Phnom Aural        | 1813      | Cambodia                | 12.0333 N, 104.1667 E | 6.9            | triple               |
| 9                                                                                                    | Fansipan           | 3143      | Vietnam                 | 22.3033 N, 103.7750 E | 8.7            | triple               |
| 10                                                                                                   | Pulag              | 2922      | Luzon                   | 16.5971 N, 120.8995 E | 1.4            | triple               |
| <b>1 peak is ridge-only. Triple/quad = 90%.</b>                                                      |                    |           |                         |                       |                |                      |
| <b>GROUP 5: Highest peaks (5) in Australia and highest peaks (5) in Victoria, AU (all fluvial)</b>   |                    |           |                         |                       |                |                      |
| Rank                                                                                                 | Name               | Elev. (m) | Region                  | Location              | Shortest Ridge | Peak type            |
| 1                                                                                                    | Mt. Kosciuszko     | 2228      | New South Wales         | 36.4559 S, 148.2633 E |                | ridge only (rounded) |
| 2                                                                                                    | Mt. Townsend       | 2209      | New South Wales         | 36.4228 S, 148.2586 E | 6.9            | triple (low relief)  |
| 3                                                                                                    | Mt. Twynam         | 2196      | New South Wales         | 36.3933 S, 148.3147 E | 3.0            | quad. (low relief)   |
| 4                                                                                                    | Rams Head          | 2190      | New South Wales         | 36.3930 S, 148.3150 E | 2.9            | triple (low relief)  |
| 5                                                                                                    | Jagungal           | 2061      | New South Wales         | 36.1486 S, 148.3877 E |                | ridge only (rounded) |
| 6                                                                                                    | Mt. Bagong         | 1986      | Victoria                | 36.7333 S, 147.3060 E | 3.8            | quad.                |
| 7                                                                                                    | Mt. Feathertop     | 1922      | Victoria                | 36.8948 S, 147.1365 E | 4.8            | triple               |
| 8                                                                                                    | Mt. Hotham         | 1861      | Victoria                | 36.9759 S, 147.1312 E | 1.6            | quad.                |
| 9                                                                                                    | Mt. McKay          | 1849      | Victoria                | 36.8745 S, 147.2431 E | 0.9            | triple (low relief)  |
| 10                                                                                                   | Mt. Buller         | 1805      | Victoria                | 37.1448 S, 146.4257 E |                | ridge only           |
| <b>3 peaks are ridge-only. Triple/quad = 70%.</b>                                                    |                    |           |                         |                       |                |                      |



| <b>GROUP 6: Highest non-volcanic peaks of countries in Central/South America (* = glacial)</b>                    |                    |           |                   |                       |                          |
|-------------------------------------------------------------------------------------------------------------------|--------------------|-----------|-------------------|-----------------------|--------------------------|
| Rank                                                                                                              | Name               | Elev. (m) | Region            | Location              | Shortest Ridge Peak type |
| 1                                                                                                                 | Cerro Chirripo     | 3820      | Costa Rica        | 9.4841 N, 83.4887 W   | 8.7 triple               |
| 2                                                                                                                 | Mogoton            | 2107      | Nicaragua         | 13.7629 N, 86.3985 W  | 2.9 triple               |
| 3                                                                                                                 | Cristobal Colon*   | 5700      | Colombia          | 10.8383 N, 73.6867 W  | 22.7 quad.               |
| 4                                                                                                                 | Bolivar            | 4981      | Venezuela         | 8.5411 N, 71.0465 W   | 5.3 quad.                |
| 5                                                                                                                 | Neblina            | 2994      | Brazil            | 0.8005 N, 66.0075 W   | 6.0 quad.                |
| 6                                                                                                                 | Cerro Pero         | 842       | Paraguay          | 25.9017 N, 56.1600 W  | 5.7 triple               |
| 7                                                                                                                 | Aconcagua*         | 6962      | Argentina         | 32.6534 S, 70.0111 W  | 12.1 quad.               |
| 8                                                                                                                 | Picos de Barroso*^ | 5142      | Andes, Arg/Chile  | 34.2868 S, 70.0332 W  | 12.6 triple              |
| 9                                                                                                                 | Yerupaja*          | 6635      | Peru              | 10.2687 S, 76.9056 W  | 2.7 triple               |
| 10                                                                                                                | Illimani*          | 6438      | Bolivia           | 16.6333 S, 67.7908 W  | 4.5 quad.                |
| ^approximate highest non-volcanic                                                                                 |                    |           |                   |                       |                          |
| <b>No peaks are ridge-only. Triple/quad = 100%.</b>                                                               |                    |           |                   |                       |                          |
| <b>GROUP 7: All peaks over 1500 m with prominence&gt;150 m in the San Gabriel Mtns., CA (all fluvial)</b>         |                    |           |                   |                       |                          |
| Rank                                                                                                              | Name               | Elev. (m) | Region            | Location              | Shortest Ridge Peak type |
| 1                                                                                                                 | Mt. San Antonio    | 3051      | San Gabriel Mtns. | 34.2891 N, 117.6462 W | 15.0 quad.               |
| 2                                                                                                                 | Pine Mt.           | 2947      | San Gabriel Mtns. | 34.3137 N, 117.6443 W | 8.2 triple               |
| 3                                                                                                                 | Dawson Pk.         | 2914      | San Gabriel Mtns. | 34.3033 N, 117.6362 W | 4.9 triple               |
| 4                                                                                                                 | Mt. Baden Powell   | 2862      | San Gabriel Mtns. | 34.3585 N, 117.7646 W | 4.5 triple               |
| 5                                                                                                                 | Throop Pk.         | 2786      | San Gabriel Mtns. | 34.3506 N, 117.7992 W | 5.4 quad.                |
| 6                                                                                                                 | Telegraph Pk.      | 2738      | San Gabriel Mtns. | 34.2616 N, 117.5985 W | 4.2 quad.                |
| 7                                                                                                                 | Cucamonga Pk.      | 2703      | San Gabriel Mtns. | 34.2226 N, 117.5853 W | 6.7 triple               |
| 8                                                                                                                 | Ontario Mt.        | 2651      | San Gabriel Mtns. | 34.2277 N, 117.6241 W | ridge only               |
| 9                                                                                                                 | Timber Mt.         | 2522      | San Gabriel Mtns. | 34.2448 N, 117.5935 W | 2.2 quad.                |
| 10                                                                                                                | Mt. Williamson     | 2516      | San Gabriel Mtns. | 34.3754 N, 117.8639 W | 0.9 triple               |
| 11                                                                                                                | Mt. Islip          | 2508      | San Gabriel Mtns. | 34.3452 N, 117.8399 W | 2.0 triple               |
| 12                                                                                                                | Waterman Mt.       | 2445      | San Gabriel Mtns. | 34.3364 N, 117.9368 W | ridge only (rounded)     |
| 13                                                                                                                | Iron Mtn.          | 2438      | San Gabriel Mtns. | 34.2884 N, 117.7134 W | 4.3 quad.                |
| 14                                                                                                                | no name            | 2432      | San Gabriel Mtns. | 34.3898 N, 117.9092 W | 3.6 triple               |
| 15                                                                                                                | Pallett Mtn.       | 2372      | San Gabriel Mtns. | 34.3856 N, 117.8855 W | 1.4 triple               |
| 16                                                                                                                | Twin Peks East     | 2364      | San Gabriel Mtns. | 34.3159 N, 117.9267 W | 0.9 triple               |
| 17                                                                                                                | Kratka Ridge       | 2290      | San Gabriel Mtns. | 34.3469 N, 117.8991 W | 1.7 triple               |
| 18                                                                                                                | Table Mtn.         | 2281      | San Gabriel Mtns. | 34.3824 N, 117.6851 W | ridge only               |
| 19                                                                                                                | Winston Peak       | 2270      | San Gabriel Mtns. | 34.3578 N, 117.9359 W | ridge only (rounded)     |
| 20                                                                                                                | Pacifico           | 2163      | San Gabriel Mtns. | 34.3820 N, 118.0346 W | 7.0 triple               |
| 21                                                                                                                | Mt. Gleason        | 1989      | San Gabriel Mtns. | 34.3762 N, 118.1769 W | 9.0 triple               |
| 22                                                                                                                | Bare Mt.           | 1924      | San Gabriel Mtns. | 34.3469 N, 117.9925 W | 3.8 triple               |
| 23                                                                                                                | Strawberry Pk.     | 1878      | San Gabriel Mtns. | 34.2835 N, 118.1206 W | 0.8 quad.                |
| 24                                                                                                                | San Gabriel Pk.    | 1857      | San Gabriel Mtns. | 34.2435 N, 118.0984 W | 1.6 quad.                |
| 25                                                                                                                | Mt. Lawlor         | 1814      | San Gabriel Mtns. | 34.2706 N, 118.1039 W | 1.5 quad.                |
| 26                                                                                                                | Sunset Pk.         | 1767      | San Gabriel Mtns. | 34.2167 N, 117.6894 W | 0.7 triple               |
| 27                                                                                                                | Rattlesnake Pk.    | 1763      | San Gabriel Mtns. | 34.2719 N, 117.7769 W | 3.3 quad.                |
| 28                                                                                                                | Mt. Wilson         | 1739      | San Gabriel Mtns. | 34.2239 N, 118.0615 W | 7.4 triple               |
| 29                                                                                                                | Iron Mtn.          | 1716      | San Gabriel Mtns. | 34.3488 N, 118.2292 W | 2.6 quad.                |
| 30                                                                                                                | Condor Peak        | 1651      | San Gabriel Mtns. | 34.3256 N, 118.2193 W | 4.3 triple               |
| 31                                                                                                                | Josephine Pk.      | 1643      | San Gabriel Mtns. | 34.2870 N, 118.1542 W | 2.5 triple               |
| 32                                                                                                                | Monrovia Pk.       | 1640      | San Gabriel Mtns. | 34.2138 N, 117.9685 W | 6.3 triple               |
| 33                                                                                                                | Mt. Lukens         | 1542      | San Gabriel Mtns. | 34.2691 N, 118.2391 W | 3.7 triple               |
| 34                                                                                                                | Snow Mt.           | 1508      | San Gabriel Mtns. | 34.3958 N, 118.2720 W | 1.7 triple               |
| 35                                                                                                                | Magic Mtn.         | 1484      | San Gabriel Mtns. | 34.3865 N, 118.3293 W | 3.2 quad.                |
| 36                                                                                                                | Yerba Buena Ridge  | 1181      | San Gabriel Mtns. | 34.3042 N, 118.2983 W | 2.9 quad.                |
| <b>4 peaks are ridge-only. Triple/quad = 89%.</b>                                                                 |                    |           |                   |                       |                          |
| <b>GROUP 8: All peaks with prominence &gt;500 m in the Mt. Everest area of Himlaya (see Figure) (all glacial)</b> |                    |           |                   |                       |                          |
| Rank                                                                                                              | Name               | Elev. (m) | Region            | Location              | Shortest Ridge Peak type |
| 1                                                                                                                 | Everest            | 8848      | Himalaya          | 27.9881 N, 86.9253 E  | 5.2 triple               |
| 2                                                                                                                 | Lhotse             | 8516      | Himalaya          | 27.9617 N, 86.9331 E  | 9.6 triple               |
| 3                                                                                                                 | Makalu             | 8485      | Himalaya          | 27.8897 N, 87.0889 E  | 8.0 triple               |
| 4                                                                                                                 | Nuptse             | 7864      | Himalaya          | 27.9675 N, 86.8869 E  | 0.8 triple               |
| 5                                                                                                                 | Chomó Lonzo        | 7804      | Himalaya          | 27.9306 N, 87.1078 E  | 4.5 triple, almost quad. |
| 6                                                                                                                 | Changtse           | 7543      | Himalaya          | 28.0247 N, 86.9142 E  | 5.0 quad.                |
| 7                                                                                                                 | Chamlong           | 7284      | Himalaya          | 27.7761 N, 86.9799 E  | 3.8 triple               |
| 8                                                                                                                 | Kharta Phu         | 7184      | Himalaya          | 28.0637 N, 86.9767 E  | 6.2 triple               |
| 9                                                                                                                 | Baruntse           | 7128      | Himalaya          | 27.8716 N, 86.9802 E  | ridge only               |
| 10                                                                                                                | no name            | 6848      | Himalaya          | 28.0692 N, 86.8994 E  | 1.8 triple               |
| 11                                                                                                                | Hongku Chuli       | 6790      | Himalaya          | 27.8175 N, 87.0089 E  | 1.4 triple               |
| 12                                                                                                                | Ama Dablam         | 6776      | Himalaya          | 27.8616 N, 86.8614 E  | 3.4 quad.                |

|                                                                                                               |                |      |          |                      |      |               |
|---------------------------------------------------------------------------------------------------------------|----------------|------|----------|----------------------|------|---------------|
| 13                                                                                                            | Katenga        | 6735 | Himalaya | 27.7922 N, 86.8167 E | 1.1  | <i>triple</i> |
| 14                                                                                                            | Kyashar        | 6723 | Himalaya | 27.7549 N, 86.8229 E | 1.8  | <i>triple</i> |
| 15                                                                                                            | Tutse          | 6694 | Himalaya | 27.7720 N, 87.0989 E | 2.9  | <i>triple</i> |
| 16                                                                                                            | no name        | 6693 | Himalaya | 27.9576 N, 87.0165 E | 3.3  | <i>triple</i> |
| 17                                                                                                            | no name        | 6688 | Himalaya | 27.8268 N, 87.0483 E | 2.4  | <i>triple</i> |
| 18                                                                                                            | Cho Pulo       | 6658 | Himalaya | 27.9195 N, 86.9811 E | 1.9  | <i>triple</i> |
| 19                                                                                                            | no name        | 6598 | Himalaya | 27.7743 N, 86.9087 E | 2.5  | <i>triple</i> |
| 20                                                                                                            | Thamserku      | 6568 | Himalaya | 27.7899 N, 86.7852 E | 3.7  | <i>triple</i> |
| 21                                                                                                            | no name        | 6503 | Himalaya | 27.8078 N, 86.8668 E | 2.8  | <i>quad.</i>  |
| 22                                                                                                            | no name        | 6380 | Himalaya | 27.8366 N, 87.1415 E | 2.9  | <i>triple</i> |
| 23                                                                                                            | Mt. Kanguru    | 6334 | Himalaya | 27.7309 N, 86.7893 E | 6.2  | <i>triple</i> |
| 24                                                                                                            | no name        | 6252 | Himalaya | 27.7273 N, 87.0074 E | 25.8 | <i>triple</i> |
| 25                                                                                                            | Tuolakangboqie | 6121 | Himalaya | 28.0688 N, 87.1642 E | 1.0  | <i>triple</i> |
| <b>1 peaks is ridge-only. Triple/quad = 96%. Six peaks in bold are counted above for the synthesis below.</b> |                |      |          |                      |      |               |
| <b>Summary = 255 peaks checked, 9 are constructional, 21 are ridge-only, 91% are triple-junction peaks.</b>   |                |      |          |                      |      |               |

**Table DR-2: Location information.**

| Location               | Denudation rate (mm/yr)* | References |
|------------------------|--------------------------|------------|
| Coast Range, B.C.      | 0.5                      | 1, 2       |
| St. Elias, AK          | 1.5                      | 3          |
| Mt. Everest, Nep.      | 1.0                      | 4          |
| Alps, Switz.           | 0.2                      | 5,6        |
| Highlands, Scot.       | 0.05                     | 7,8        |
| Chugach R., AK         | 0.2                      | 9          |
| Alaska R., AK          | 1.0                      | 10         |
| Nanga Parbat, Pak.     | 5.0                      | 11,12      |
| Tierra d. Fuego        | 1.0                      | 13,14      |
| S. Alps, NZ            | 3.0                      | 15,16      |
| Smoky Mtn., NC         | 0.04                     | 17         |
| San Gabriel Mtn., CA   | 2.0                      | 18         |
| Central Range, Taiw.   | 3.0                      | 19,20      |
| Caucasus, Russ./Georg. | 0.5                      | 21         |
| Atlas Mtns., Morr.     | 0.2                      | 22,23      |
| Bermejo, Ecuad.        | 0.3                      | 24,25      |
| Lesser Himal., Nep.    | 0.3                      | 26,27      |
| Nanga Parbat, Pak.     | 1.0                      | 11,12      |
| Marsyandi, Nep.        | 3.0                      | 28,29      |
| King Range, CA         | 0.5                      | 30         |

Long-term erosion rates were interpreted from combinations of references and data types spanning a range of timescales, including thermochronometry, cosmochronometry, and sediment yields. In some cases, the rates used are reported directly from papers, but in other cases data were re-interpreted to provide a simple estimate of exhumation rate. This commonly required assumption of geothermal gradient and averaging regional data or using a geologically-controlled time of onset of orogenesis and the total exhumation since that time. For example, if low-temperature apatite (U-Th)/He cooling ages have not been reset in an area with a moderately high geothermal gradient and in which exhumation began 3 Ma, the total exhumation possible is likely  $<1.5 \text{ km}/3 \text{ Ma} = <0.5 \text{ mm/yr}$ . In other cases, exhumation rates were assumed based on the gradient of age-elevation relationships. In many cases, constraints were not available in the exact area of the ridge maps, so extrapolation from neighboring areas was required (often from multiple sources and directions). As a result, the erosion rates used here should be treated as poorly constrained (e.g.  $\pm 100\%$ ). Although this is a large error, the erosion rates should be approximately correct (i.e. order of magnitude) and thus provide the means for at least a first-order comparison with ridge network metrics.

#### References

- 1) Ehlers, T.A., Farley, K.A., Rusmore, M.E., and Woodsworth, G.J., 2006, Apatite (U-Th)/He signal of large-magnitude accelerated glacial erosion, British Columbia, *Geology*, 34, 765-768.
- 2) Densmore, M.S., Ehlers, T.A., and Woodsworth, G.J., 2007, Effect of alpine glaciation on thermochronometer age-elevation profiles, *Geophys. Res. Lett.*, 34, L02502.
- 3) Berger, A.L., and Spotila, J.A., 2008, Denudation and deformation of a glaciated orogenic wedge: The St. Elias orogen, Alaska, *Geology*, 36, 523-526.
- 4) Bergman, S.C., Coffield, D.Q., Donelick, R., Corrigan, J., Talbot, J., Cervený, P., and Kelley, S., 1993, Late Cenozoic compressional and extensional cooling and exhumation of the Qomolagha (Mt. Everest) region, Nepal, *Geol. Soc. Amer. Abstr. with Programs*, 25, 6, A-176.
- 5) Cederbom, C.E., Sinclair, H.D., Schlunegger, F., and Rahn, M.K., 2004, Climate-induced rebound and exhumation of the European Alps, *Geology*, 32, 709-712.
- 6) Champagnac, J.D., Schlunegger, F., Norton, K., Blanckenburg, F., Abbühl, L.M., and Schwab, M., 2009, Erosion-driven uplift of the modern Central Alps, *Tectonophysics*, 474, 236-249.
- 7) Thomson, K., Underhill, J.R., Green, P.F., Bray, R.J., and Gibson, H.J., 1999, Evidence from apatite fission track analysis for the post-Devonian burial and exhumation history of the northern Highlands, Scotland, *Marine and Petroleum Geology*, 16, 27-39.
- 8) Persano, C., Stuart, F.M., Barfod, D.N., Bishop, P., and Brown, R.W., 2005, Constraining denudation in Scotland by using a combination of low temperature thermochronometers, *Goldschmidt Conference Abstracts, Geochimica et Cosmochimica Acta*, 299.
- 9) Spotila, J.A., and Berger, A.L., 2010, Exhumation at orogenic indenter corners under long-term glacial conditions: Example of the St. Elias Orogen, Southern Alaska, *Tectonophysics*, 490, 241-256.
- 10) Benowitz, J.A., Layer, P., Armstrong, P., Perry, S., Haeussler, P., Fitzgerald, P., and VanLaningham, S., 2011, Spatial variations in focused exhumation along a continental-scale strike-slip fault: The Denali fault of the eastern Alaska Range, *Geosphere*.

- 11) Zeitler, P.K., Koons, P.O., Bishop, M., Chamberlain, and 16 others, 2001, Crustal reworking at Nanga Parbat, Pakistan; metamorphic consequences of thermal-mechanical coupling facilitated by erosion, *Tectonics*, 20, 712-728.
- 12) Schneider, D.A., Zeitler, P.K., Kidd, W.S.F., Edwards, M.A., 2001, Geochronology constraints on the tectonic evolution and exhumation of Nanga Parbat, western Himalayan syntaxis, revisited, *J. Geology*, 109, 563-583.
- 13) Thomson, S.N., 2002, Late Cenozoic geomorphic and tectonic evolution of the Patagonian Andes between latitudes 42°S and 46°S: An appraisal based on fission-track results from the transpressional intra-arc Liquiñe-Ofqui fault zone, *Geol. Soc. Amer. Bull.*, 114, 1159-1173.
- 14) Thomson, S.N., Brandon, M.T., Tomkin, J.H., Reiners, P.W., Vasquez, C., and Wilson, N., 2010, Glaciation as a destructive and constructive control on mountain building, *Nature*, 467, 313-317.
- 15) Little, T.A., Cox, S., Vry, J.K., and Batt, G., 2005, Variations in exhumation level and uplift rate along the oblique-slip Alpine fault, central Southern Alps, New Zealand, *Geol. Soc. Amer. Bull.*, 117, 707-723.
- 16) Batt, G.E., Braun, J., Kohn, B.P., and McDougall, I., 2000, Thermochronological analysis of the dynamics of the Southern Alps, New Zealand, *Geol. Soc. Amer. Bull.*, 112, 250-266.
- 17) Matmon, A., Bierman, P., Larsen, J., Southworth, S., Pavich, M., and Caffee, M., 2003, Temporally and spatially uniform rates of erosion in the southern Appalachian Great Smoky Mountains, *Geology*, 31, 155-158.
- 18) Spotila, J.A., House, M.A., Blythe, A.E., Niemi, N.A., Bank, G.C., 2002. Controls on the erosion and geomorphic evolution of the San Bernardino and San Gabriel Mountains, Southern California, in *Contributions to crustal evolution of the Southwestern United States*, Spec. Pap. Geol. Soc. Am., 365, 205-230.
- 19) Beyssac, O., Simoes, M., Avouac, J.P., Farley, K.A., Chen, Y.-G., Chan, Y.-C., and Goffe, B., 2007, Late Cenozoic metamorphic evolution and exhumation of Taiwan, *Tectonics*, 26, TC6001.
- 20) Fuller, C.W., Willett, S.D., Fisher, D., and Lu, C.Y., 2006, A thermomechanical wedge model of Taiwan constrained by fission-track thermochronometry, *Tectonophysics*, 425, 1-24.
- 21) Vincent, S.J., Carter, A., Lavrishchev, V.A., Rice, S.P., Barabazde, T.G., and Hovius, N., 2010, The exhumation of the western Greater Caucasus: a thermochronometric study, *Geol. Mag.*, 148, 1-21.
- 22) Balestrieri, M.L., Moratti, G., Bigazzi, G., and Algouti, A., 2009, Neogene exhumation of the Marrakech High Atlas (Morocco) recorded by apatite fission-track analysis, *Terra Nova*, 21, 75-82.
- 23) Delcaillau, B., Laville, E., Amhrar, M., Namous, M., Dugue, O., and Pedoja, K., 2010, Quaternary evolution of the Marrakech High Atlas and morphotectonic evidence of activity along the Tizi n'Test fault, Morocco, *Geomorphology*, 118, 262-279.
- 24) Spikings, R.A., Winkler, W., Hughes, R.A., and Handler, R., 2005, Thermochronology of allochthonous terranes in Ecuador: Unravelling the accretionary and post-accretionary history of the Northern Andes, *Tectonophysics*, 399, 195-220.
- 25) Spikings, R.A., and Crowhurst, P.V., 2004, (U-Th)/He thermochronometric constraints on the late Miocene-Pliocene tectonic development of the northern Cordillera Real and the Interandean Depression, Ecuador, *J. S. Amer. Earth Sci.*, 17, 239-251.
- 26) Patel, R.C., Kumar, Y., Lal, N., and Kumar, A., 2007, Thermotectonic history of the Chiplakot Crystalline Belt in the Lesser Himalaya, Kumaon, India: Constraints from apatite fission-track thermochronology, *J. Asian Earth Sci.*, 29, 430-439.
- 27) Herman, F., Copeland, P., Avouac, J.-P., and Bollinger, L., 2010, Exhumation, crustal deformation, and thermal structure of the Nepal Himalaya derived from the inversion of thermochronological and thermobarometric data and modeling of the topography, *J. Geophys. Res.*, 114, B06407.
- 28) Lave, J., and Avouac, J.P., 2001, Fluvial incision and tectonic uplift across the Himalayas of central Nepal, *J. Geophys. Res.*, 106, 26,561-26,591.
- 29) Blythe, A.E., Burbank, D.W., Carter, A., Schmidt, K., Putkonen, J., 2007, Plio-Quaternary exhumation history of the central Nepalese Himalaya: 1. Apatite and zircon fission track and apatite (U-Th)/He analyses, *Tectonics*, 26, TC3002.
- 30) Dumitru, T.A., 1991, Major Quaternary uplift along the northernmost San Andreas fault, King Range, northwestern California, *Geology*, 19, 526-529.

**Table DR-3: Results from ridge profiles.**

| Location               | DJ=pks.    | Max=DJ-pks. | Avg. slope   | $\Psi_1$    | $\Psi_2$    |
|------------------------|------------|-------------|--------------|-------------|-------------|
| <b>Glacial</b>         |            |             |              |             |             |
| Coast Range, B.C.      | 55%        | 31%         | 10.7°        | 0.24        | 1.92        |
| St. Elias, AK          | 73%        | 32%         | 9.1°         | 0.20        | 1.74        |
| Mt. Everest, Nepal     | 83%        | 38%         | 19.3°        | 0.20        | 3.20        |
| Alps, Switzerland      | 71%        | 43%         | 10.9°        | 0.13        | 2.05        |
| Highlands, Scotland    | 88%        | 23%         | 6.7°         | 0.21        | 1.45        |
| <b>Average</b>         | <b>74%</b> | <b>33%</b>  | <b>11.3°</b> | <b>0.20</b> | <b>2.07</b> |
| <b>Fluvial</b>         |            |             |              |             |             |
| Smoky Mtn., NC         | 68%        | 59%         | 1.6°         | 0.32        | 1.22        |
| San Gabriel Mtn., CA   | 68%        | 50%         | 9.3°         | 0.32        | 1.76        |
| Central Range, Taiwan  | 72%        | 52%         | 7.1°         | 0.30        | 1.49        |
| Caucasus, Georgia      | 73%        | 62%         | 8.1°         | 0.25        | 1.62        |
| Atlas Mtns., Morocco   | 62%        | 35%         | 7.8°         | 0.30        | 1.51        |
| <b>Average</b>         | <b>69%</b> | <b>52%</b>  | <b>6.8°</b>  | <b>0.30</b> | <b>1.52</b> |
| <b>Overall average</b> | <b>72%</b> | <b>43%</b>  | <b>9.0°</b>  | <b>0.25</b> | <b>1.80</b> |

DJ=peaks: percent of divide junctions that occur at peaks.

Max=DJ-peaks: percent of all elevation maxima that are divide-junction peaks.

Avg. slope: slope of the ridge along the profile.

$\Psi_1$ : topographic roughness #1; unit distance (relative to entire profile over which half of the ridge's relief is attained (low value = rougher).

$\Psi_2$ : topographic roughness #2; vertical irregularity (akin to sinuosity) of profile, measured at 8x vertical exaggeration (high value = rougher).

**Table DR-4: Results from ridge maps.**

| Location                    | $\rho$ (km <sup>-1</sup> ) | $\gamma$ (km <sup>-2</sup> ) | $\chi$ (km <sup>-1</sup> ) | Sin.        | Relief (m) | Denud. |
|-----------------------------|----------------------------|------------------------------|----------------------------|-------------|------------|--------|
| <b>Glacial</b>              |                            |                              |                            |             |            |        |
| Coast Range, British Co.    | 0.358                      | 0.029                        | 0.080                      | 1.33        | 4019       | 0.5    |
| St. Elias, AK               | 0.236                      | 0.018                        | 0.078                      | 1.23        | 2502       | 1.5    |
| Mt. Everest, Nepal          | 0.285                      | 0.024                        | 0.083                      | 1.22        | 7450       | 1.0    |
| Alps, Switzerland           | 0.268                      | 0.022                        | 0.084                      | 1.23        | 3920       | 0.2    |
| Highlands, Scotland*        | 0.279                      | 0.014*                       | 0.050*                     | -           | 1060       | 0.05   |
| Chugach Range, AK*          | 0.244                      | 0.012*                       | 0.051*                     | 1.35        | 2139       | 0.2    |
| Alaska Range, AK            | 0.254                      | 0.021                        | 0.082                      | 1.40        | 5493       | 1.0    |
| Nanga Parbat, Pakistan      | 0.308                      | 0.033                        | 0.107                      | 1.21        | 5526       | 5.0    |
| Tierra d. Fuego             | 0.238                      | 0.017                        | 0.073                      | 1.35        | 2520       | 1.0    |
| S. Alps, New Zealand        | 0.269                      | 0.025                        | 0.093                      | 1.21        | 3680       | 3.0    |
| <b>Average</b>              | <b>0.274</b>               | <b>0.022</b>                 | <b>0.078</b>               | <b>1.28</b> |            |        |
| $R^2$ vs. relief**          | 0.11                       | 0.44                         | 0.46                       | 0.07        |            |        |
| $R^2$ vs. denudation rate** | 0.03                       | 0.48                         | 0.63                       | 0.25        |            |        |
| <b>Fluvial</b>              |                            |                              |                            |             |            |        |
| Smoky Mtn., NC              | 0.235                      | 0.019                        | 0.082                      | 1.19        | 1750       | 0.04   |
| San Gabriel Mtn., CA        | 0.311                      | 0.025                        | 0.080                      | 1.24        | 2580       | 2.0    |
| Central Range, Taiwan       | 0.302                      | 0.028                        | 0.093                      | 1.27        | 3750       | 3.0    |
| Caucasus, Georgia           | 0.299                      | 0.028                        | 0.094                      | 1.18        | 3615       | 0.5    |
| Atlas Mtns., Morocco*       | 0.282                      | 0.016*                       | 0.055*                     | 1.19        | 3367       | 0.2    |
| Bermejo, Ecuador*           | 0.304                      | 0.018*                       | 0.058*                     | 1.24        | 3540       | 0.3    |
| Lesser Himalaya, Nepal      | 0.257                      | 0.017                        | 0.065                      | 1.23        | 4360       | 0.3    |
| Nanga Parbat, Pakistan      | 0.307                      | 0.024                        | 0.078                      | 1.20        | 3700       | 1.0    |
| Marsyandi, Nepal            | 0.236                      | 0.016                        | 0.068                      | 1.20        | 7150       | 3.0    |
| King Range, CA              | 0.272                      | 0.019                        | 0.070                      | 1.18        | 1113       | 0.5    |
| <b>Average</b>              | <b>0.281</b>               | <b>0.021</b>                 | <b>0.074</b>               | <b>1.21</b> |            |        |
| $R^2$ vs. relief**          | 0.05                       | 0.04                         | 0.03                       | 0.03        |            |        |
| $R^2$ vs. denudation rate** | 0.01                       | 0.11                         | 0.12                       | 0.27        |            |        |
| <b>Overall average</b>      | <b>0.278</b>               | <b>0.021</b>                 | <b>0.076</b>               | <b>1.25</b> |            |        |

$\rho$ : ridge density, or total length of ridges divided by area.

$\gamma$ : junction density, or total number of divide junctions divided by map area.

$\chi$ : divide connectivity, number of divide junctions per unit length of ridges.

Sin: sinuosity, irregular ridge length divided by linear ridge length.

Denud.: long-term denudation rate, mm/yr (see Table DR-2).

\*Note anomalously poor divide connectivity for these four outliers; see text.

\*\*Correlation coefficients based on basic regressions between  $\rho$ ,  $\gamma$ ,  $\chi$ , and sinuosity vs. relief and denudation rate. Plots not shown (no strong correlations).

## Figure DR-1

The geometry of peaks. A) Hillslopes with parallel trends, even at the angle of repose (hillslope angle =  $\delta$ ), will create a horizontal ridgeline. B) Oblique hillslopes (obliquity angle =  $\gamma$ ) will generate an inclined ridgeline (ridgeline angle =  $\theta$ ). In this example, hillsides at the angle of repose ( $\delta=34^\circ$ ) that intersect by  $24^\circ$  ( $\gamma$ ) will generate a ridgeline slope ( $\theta$ ) of  $8^\circ$ . C) Plot of increasing ridgeline slope with increasing obliquity between hillsides, for select hillslope gradients. D) Conceptual diagram illustrating how the competition of abutting basins, represented by the relative horizontal velocity of the headwall or channel head ( $U_a$  vs.  $U_b$ ), should shape the intervening ridgeline. In this case,  $U_a > U_b$  requires that the ridge migrate from left to right, although it is easy to envision a spectrum of possible scenarios. E) Illustration of peak “prominence”. Prominence is defined as the relative height of a peak above the lowest contour that underlies it and no taller peak. The three peaks shown have prominence defined by the arrows. Note that although the middle peak may be very high, its prominence is simply the relative height of the peak above the saddle to its right. F) Two example ridgeline profiles with different scales of peak prominence. The parabolic ridge on the left has many peaks of small prominence, but only one peak that exceeds the prominence threshold indicated by the bar. The ridge on the right has lower mean elevation, but a higher number of prominent peaks, because of the low saddles. G) Illustration of measurement of third-shortest contributing divide. For the divide-junction circled, the path shown by dashed line would be measured as the third shortest divide. It is shorter than divides #1 and #2, but follows the primary divide leaving the junction as opposed to following a shorter secondary divide (e.g. #3) down to base level.

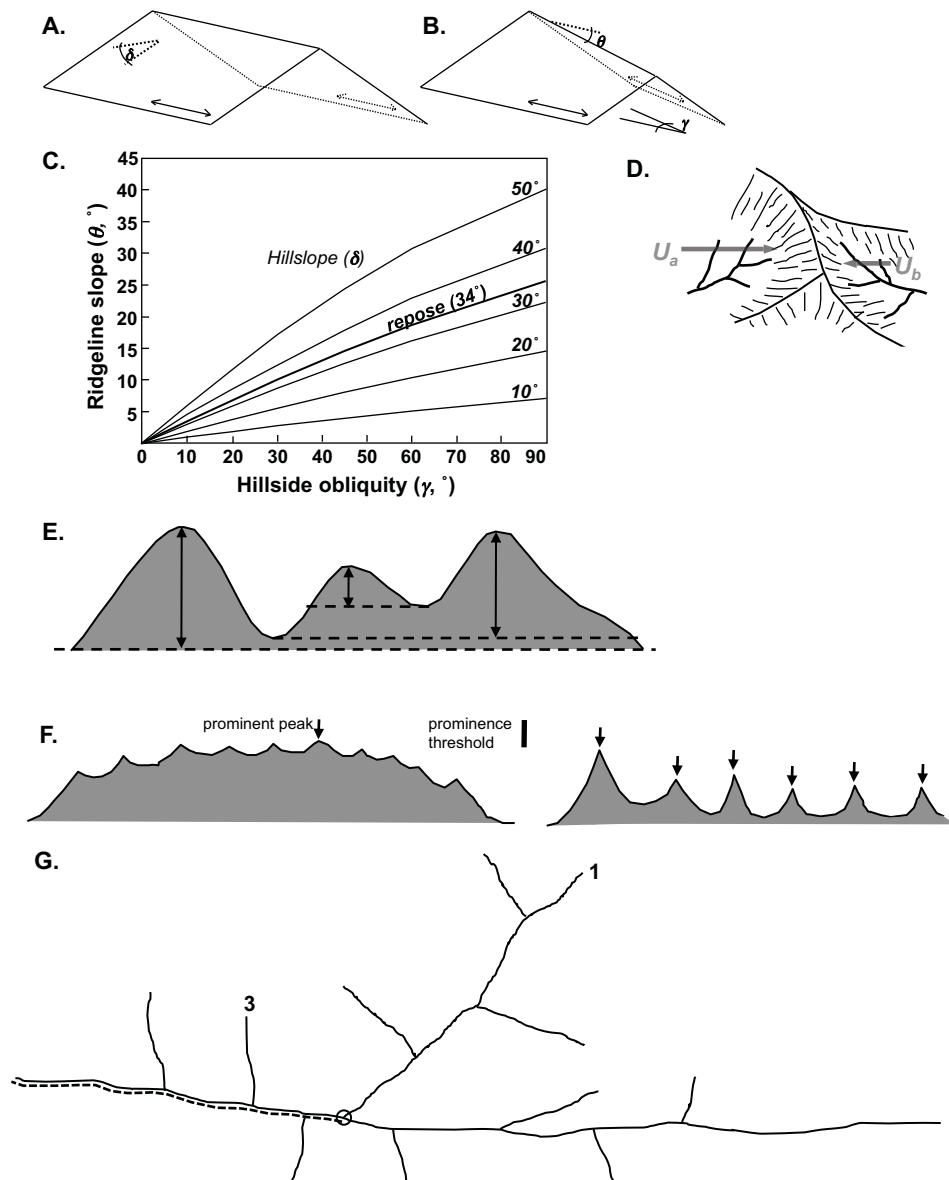



## Figure DR-2

Additional example images of prominent pyramidal peaks that occur at the junction of major ridges. The first five are from glacial settings, whereas Baden Powell, Yushan, and Twin Peaks are fluvial. Scales and aspects of each image are variable, as noted. Images were captured from GoogleEarth. Numbers refer to the group and peak number in Table DR-I.

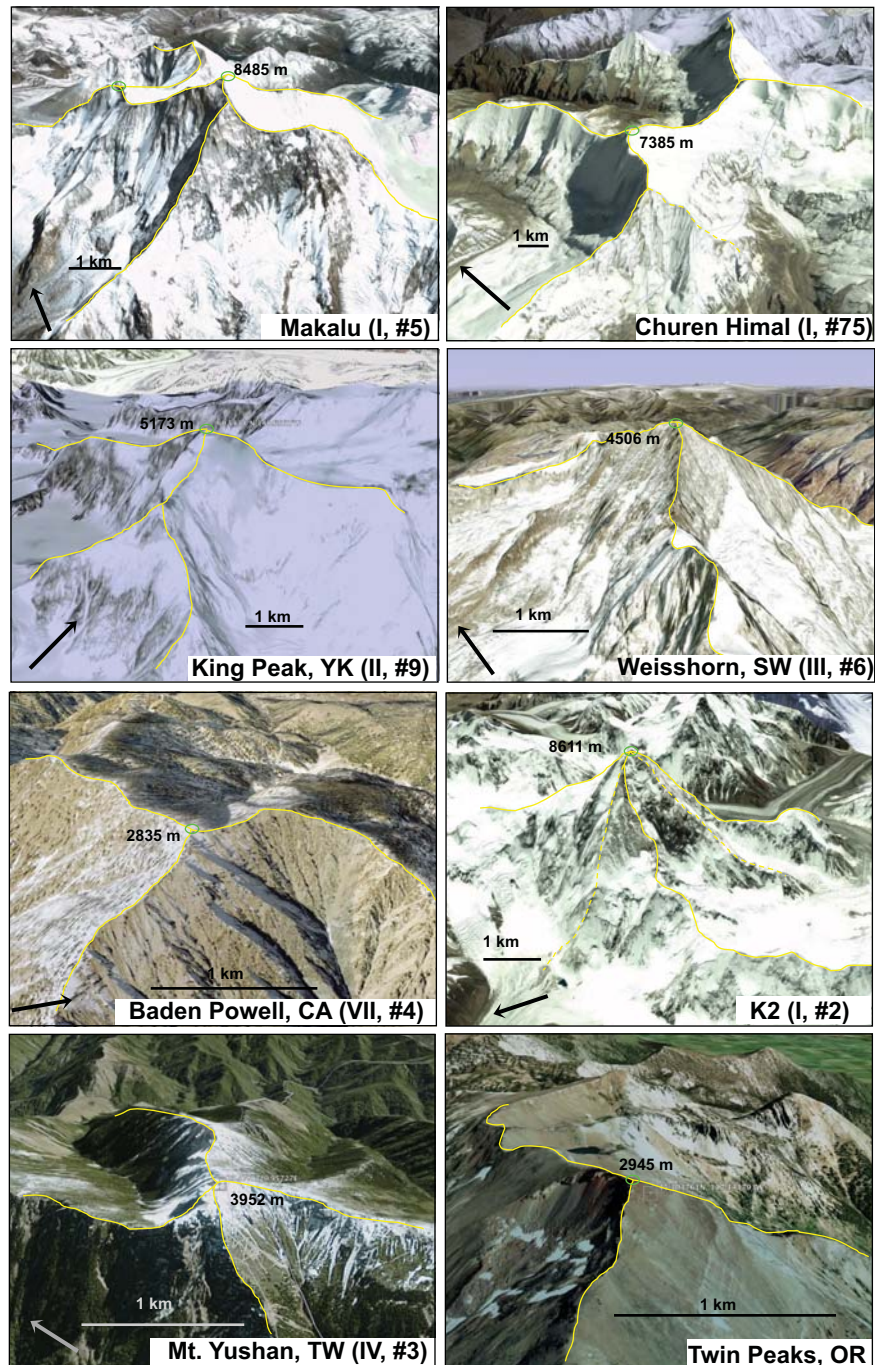



### **Figure DR-3**

Examples of prominent peaks identified in the global survey (numbers provided referring to Table DR-1) that would not classify as divide-juncton. These are characteristic examples of ridge-only peaks. In some cases, it may appear that a third contributing ridge exists, but on close examination these divides do not come within 0.2 km of the peak itself. All examples are from the Himalaya: A) Broad Peak (Group I, #12), B) Teram Kangri (Group I, #59), C) Baintha Brakk (Group 1, #90), D) Muztagh Tower (Group I, #94) (see Table DR-1). Scale bar represents 1 km in all cases.

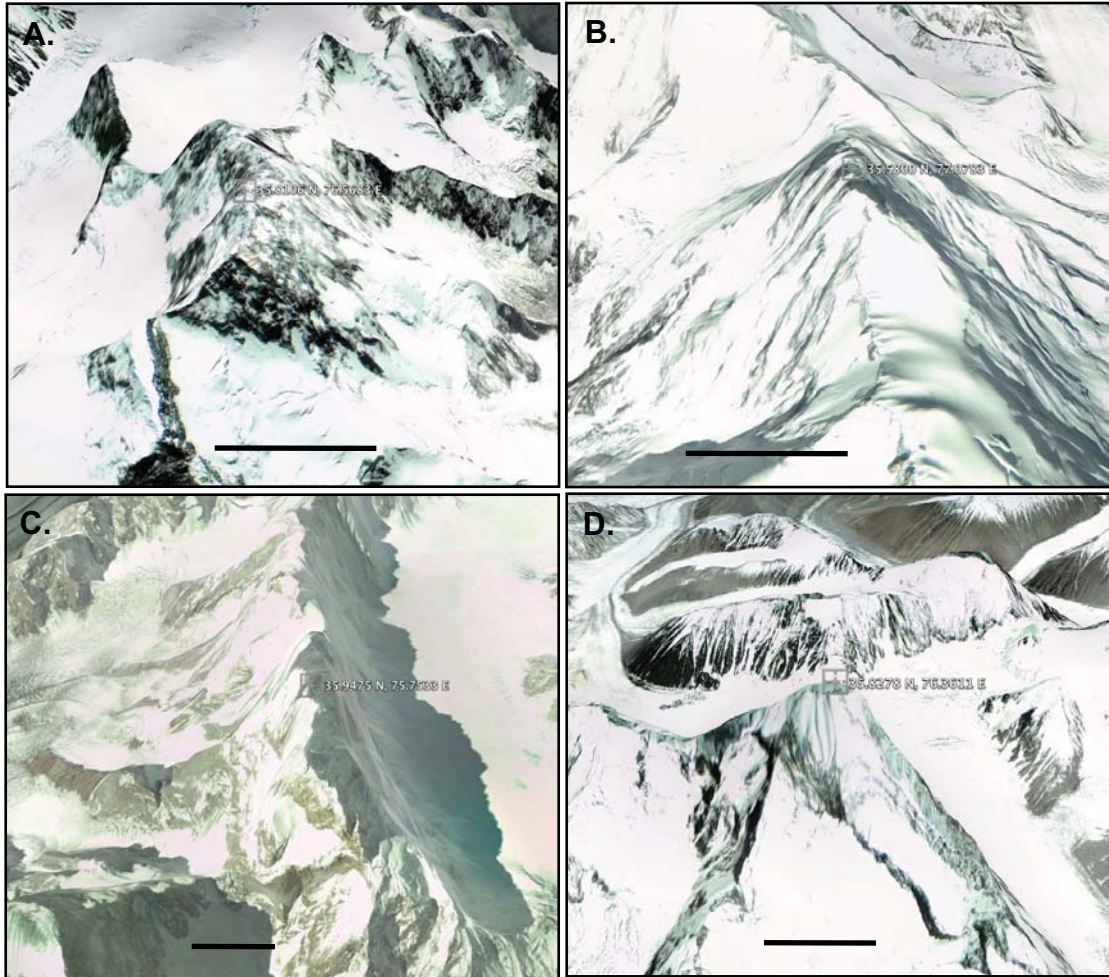

**Figure DR-4a** Summary of all 10 ridgeline maps in fluvial locations. Locations are indicated by coordinates of highest peak in each area (triangle). An asterisk indicates that the peak is not a divide-junction peak at the scale of these maps; that is, it does not co-locate with a third-shortest contributing divide that is >5 km long (note that this differs from the criteria used in Table 1, DR-1). North is vertical on all maps except Ecuador. The dashed lines enclosing the mapped areas are in some cases the boundary of a small ranges, but in others is arbitrary sampling of a larger area (normally following valleys). Red divides are profiles in Figure DR-5.

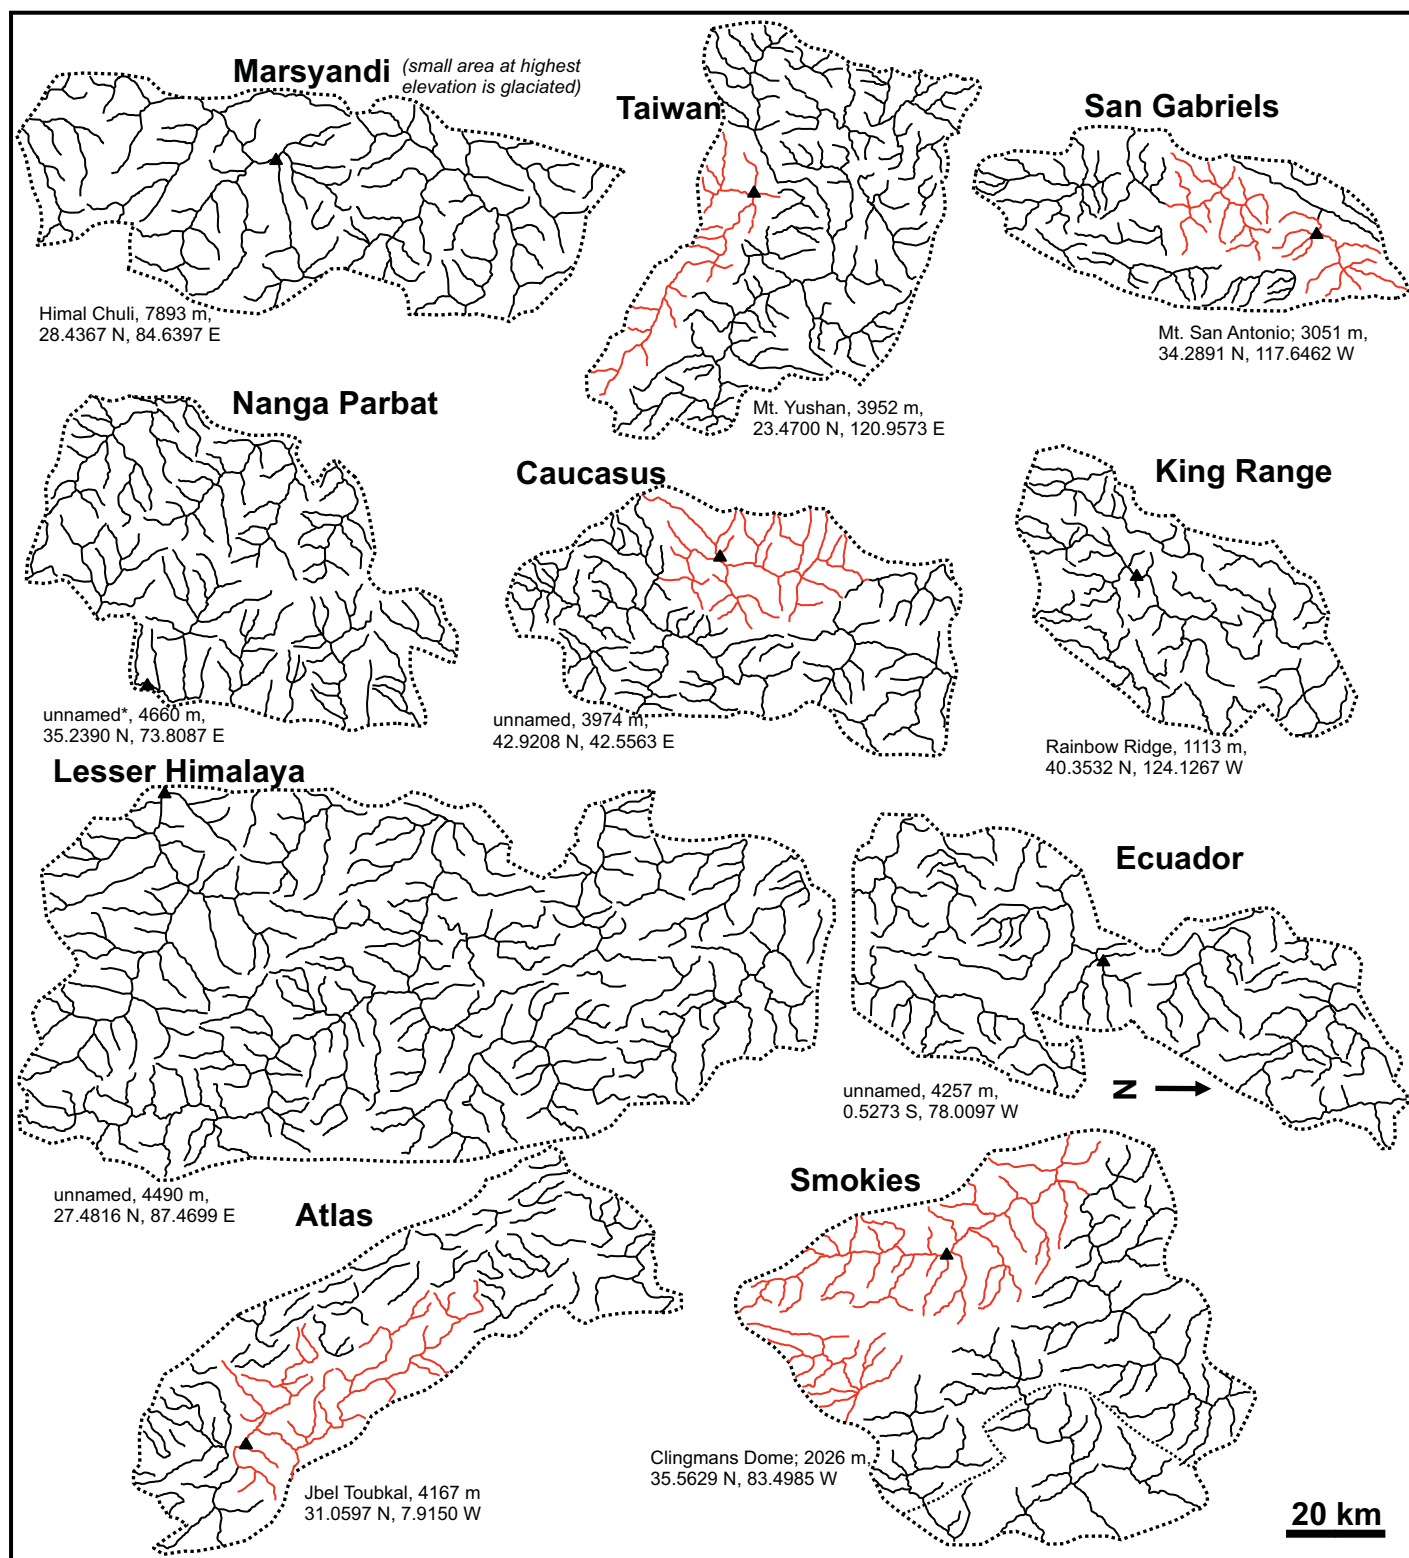

**Figure DR-4b** Summary of all 10 ridgeline maps in glacial locations.

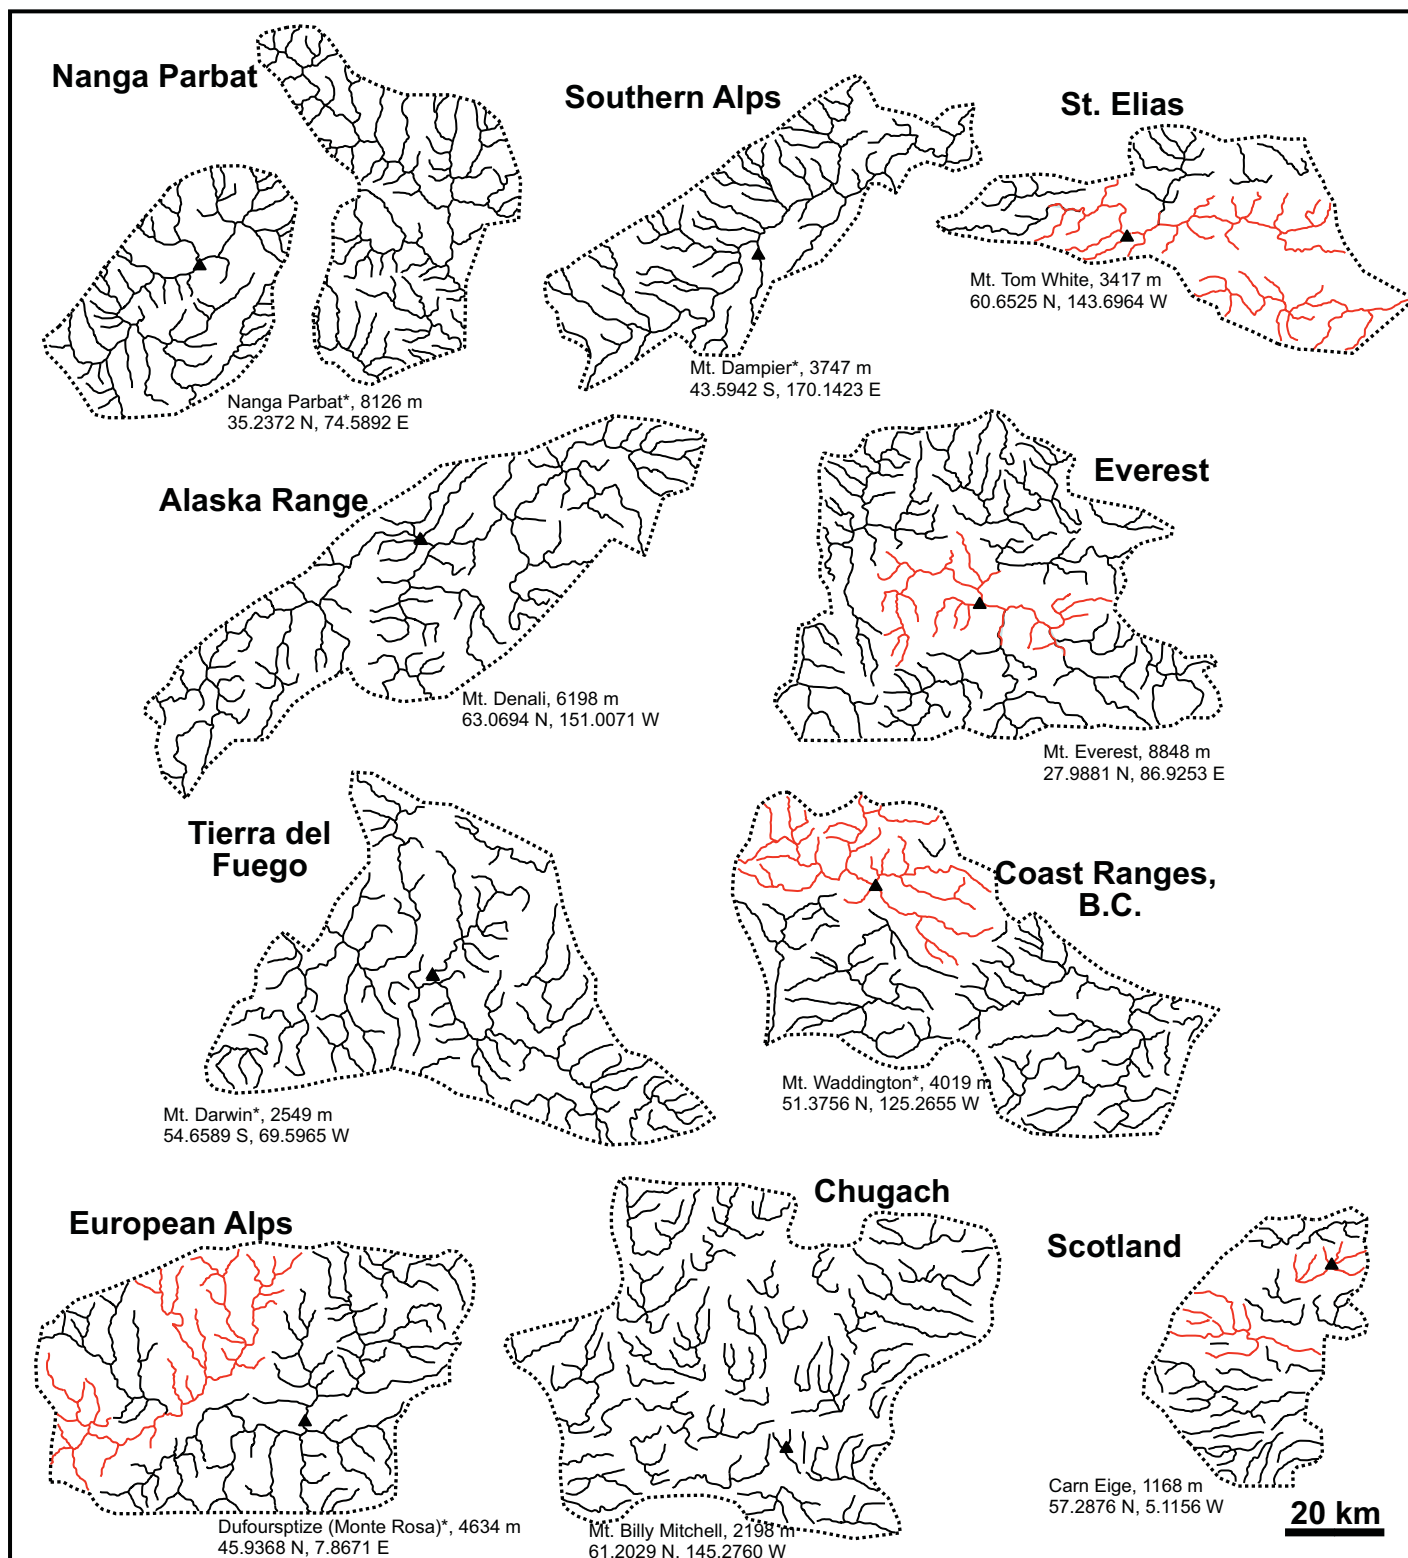

**Figure DR-5**

All ridgeline profiles constructed in this study. Profiles are exaggerated 7.7x and are from five fluvial and five glacial areas, as listed in Table 2. Note that these are not familiar swath or linear elevation profiles, but rather the elevation along the irregular line of mapped ridge. Secondary ridges that join the primary ridge from the flank are also plotted, color coded for direction from which they approach. The location of peaks and divide junctions (DJs) are indicated (green circle = peak; yellow box = triple junction; orange box = quadruple junction). Statistics are listed at the side and in Table 2. Arrows show the location of the four highest prominent peaks in each area.

**Smoky Mtns., secondary, fluvial**

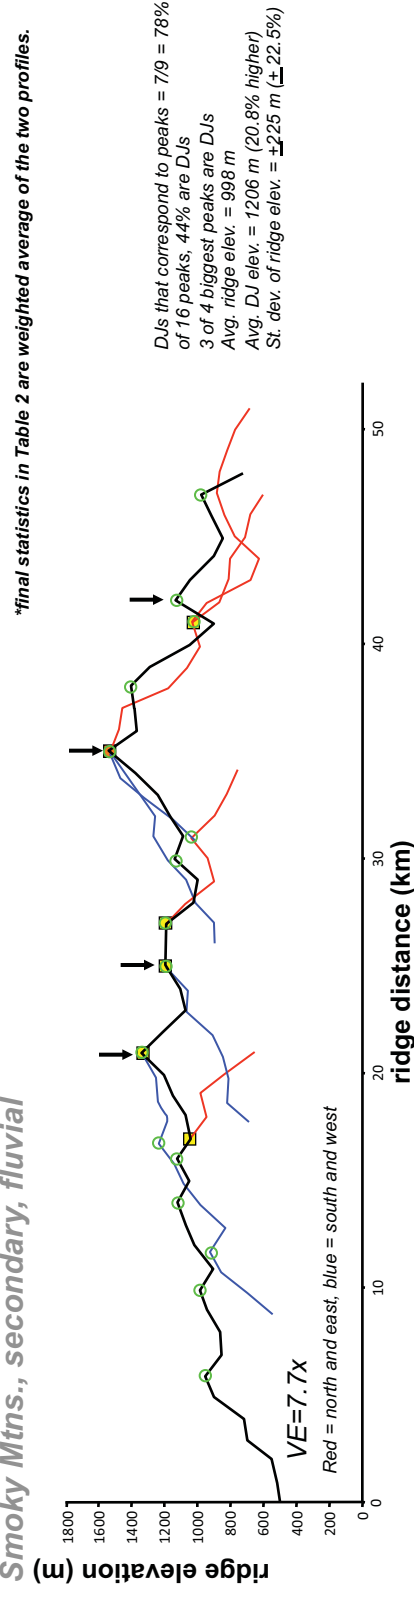

**Smoky Mtns., Clingmans Dome**

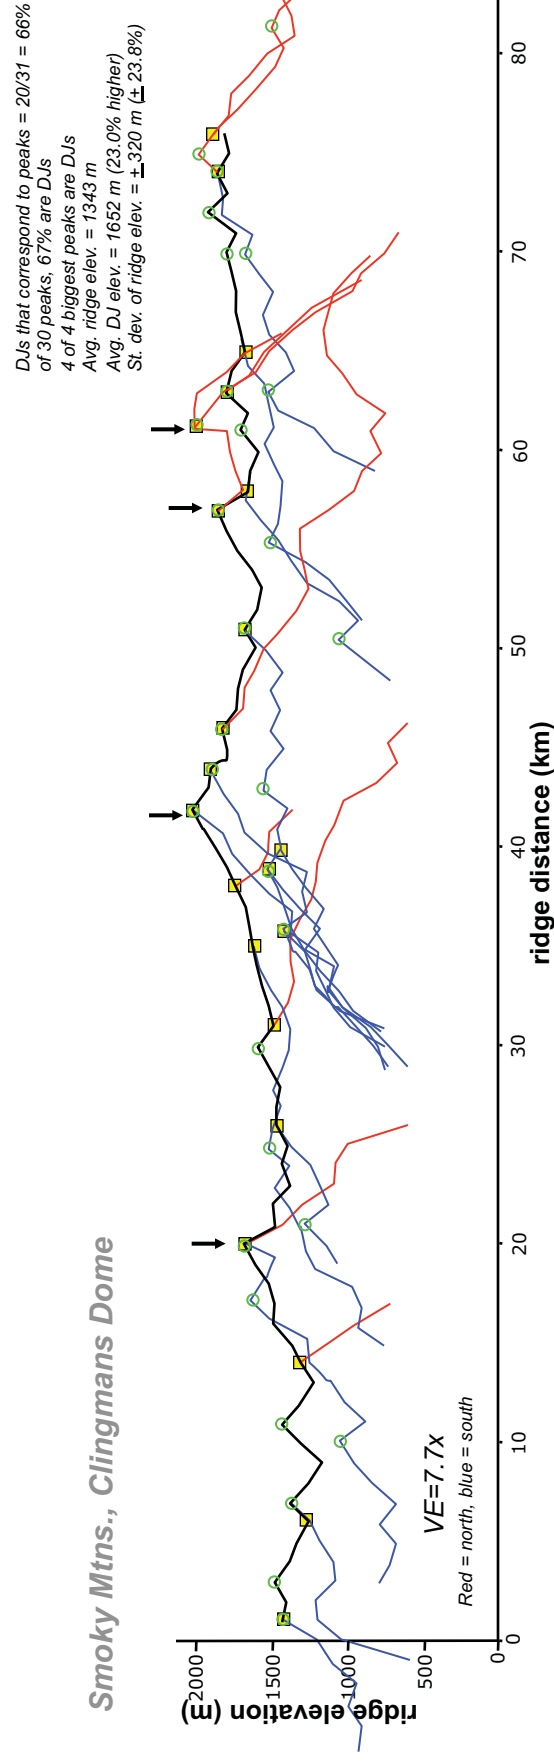

**Figure DR-5. cont.**

*\*final statistics in Table 2 are weighted average of the two profiles.*

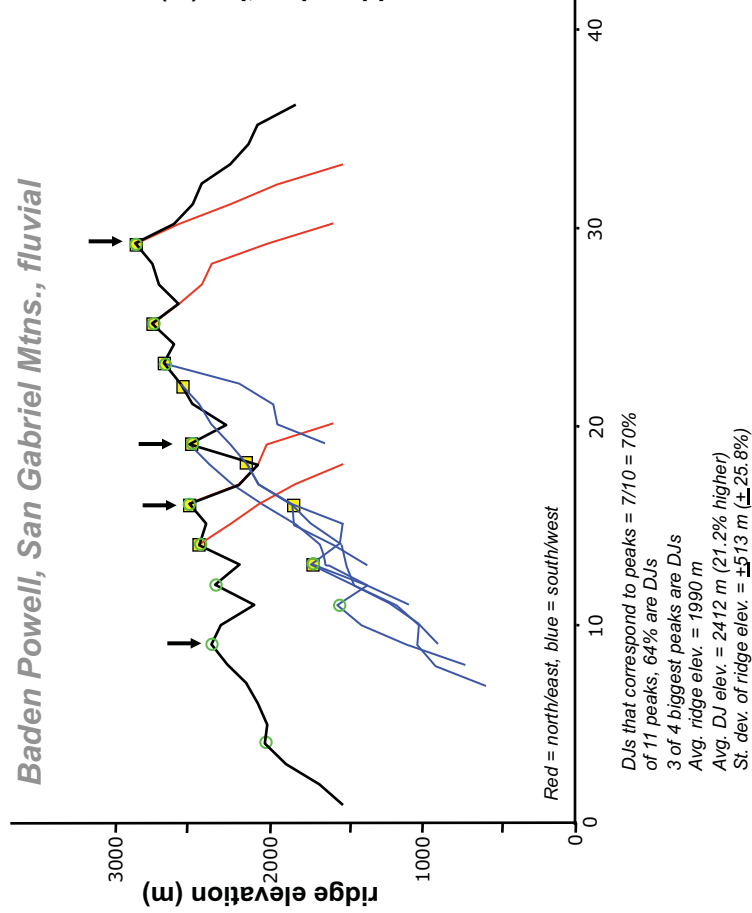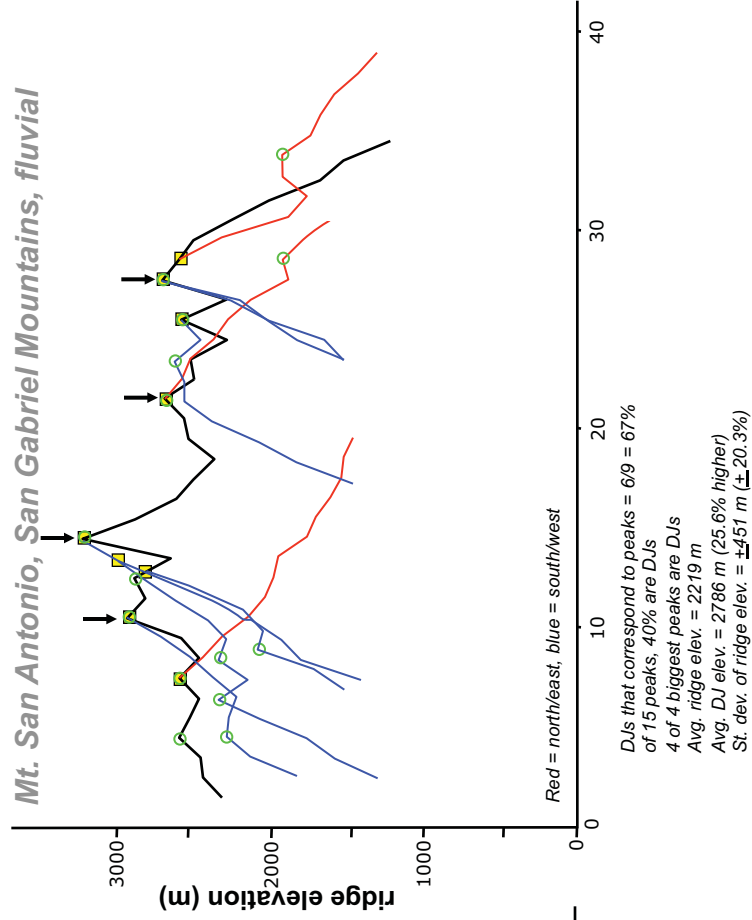



**Figure DR-5. cont.**

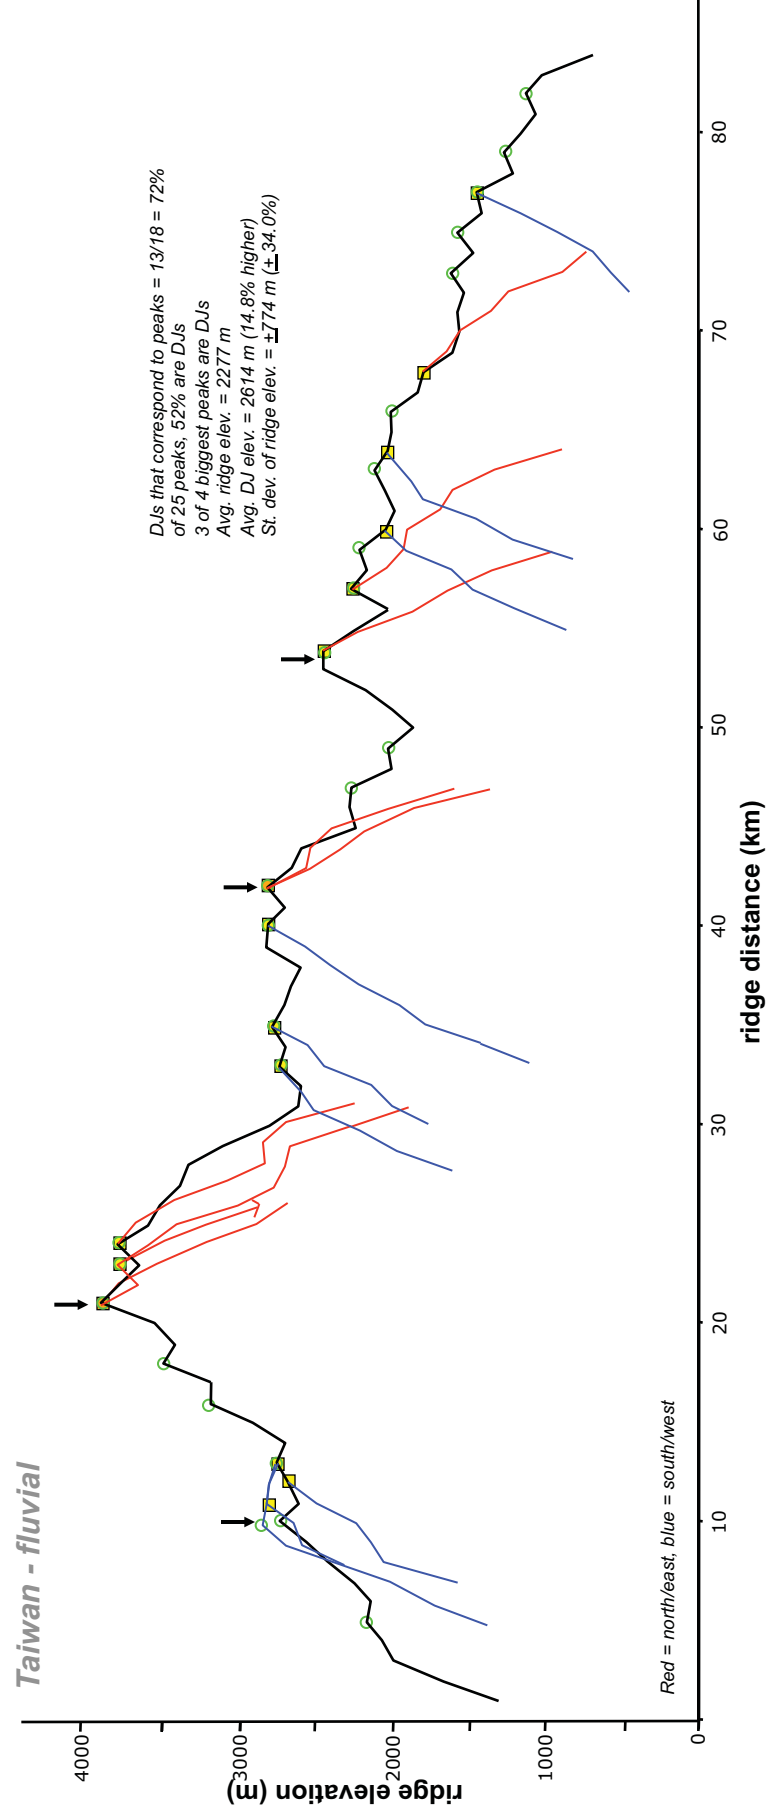

**Figure DR-5. cont.**

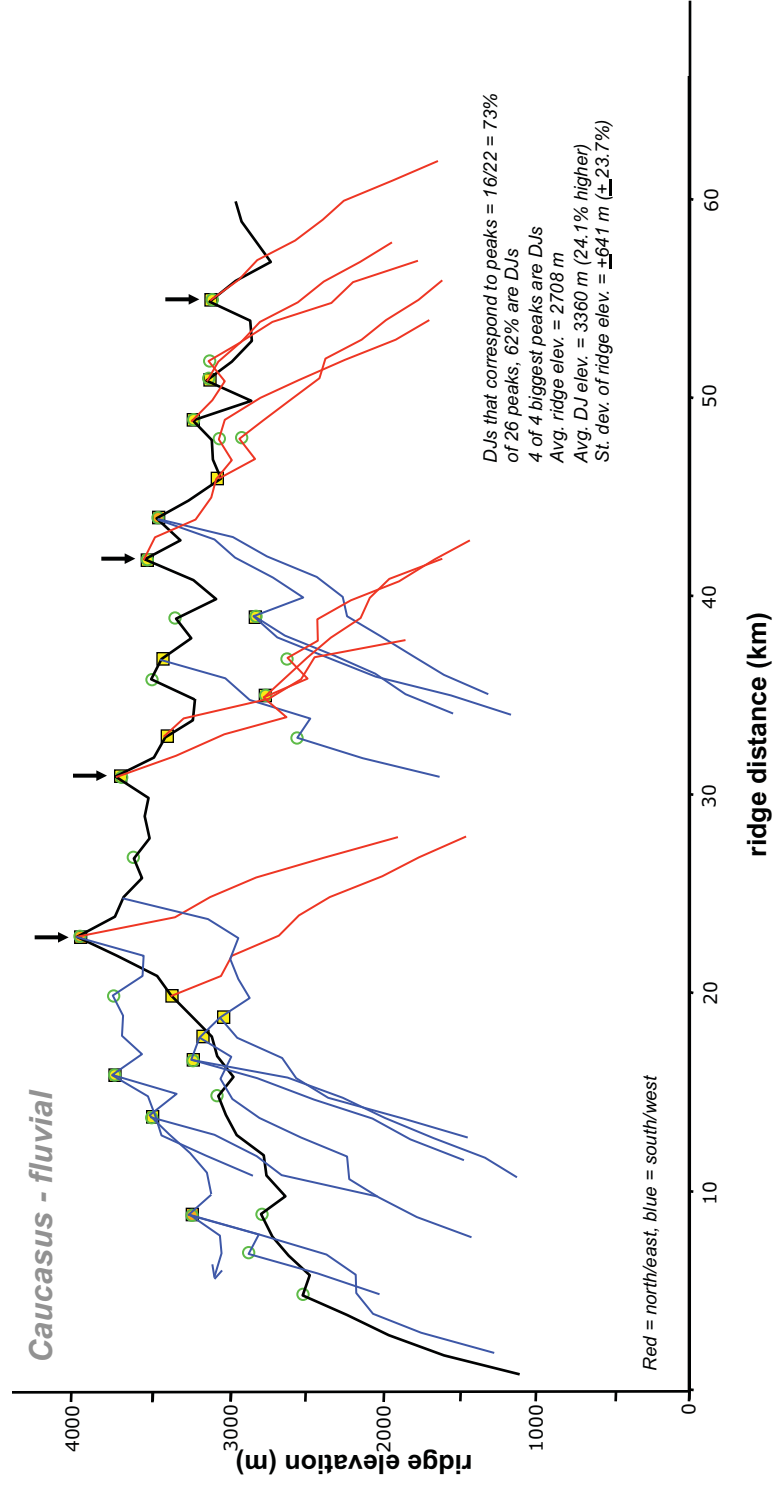



**Figure DR-5. cont.**

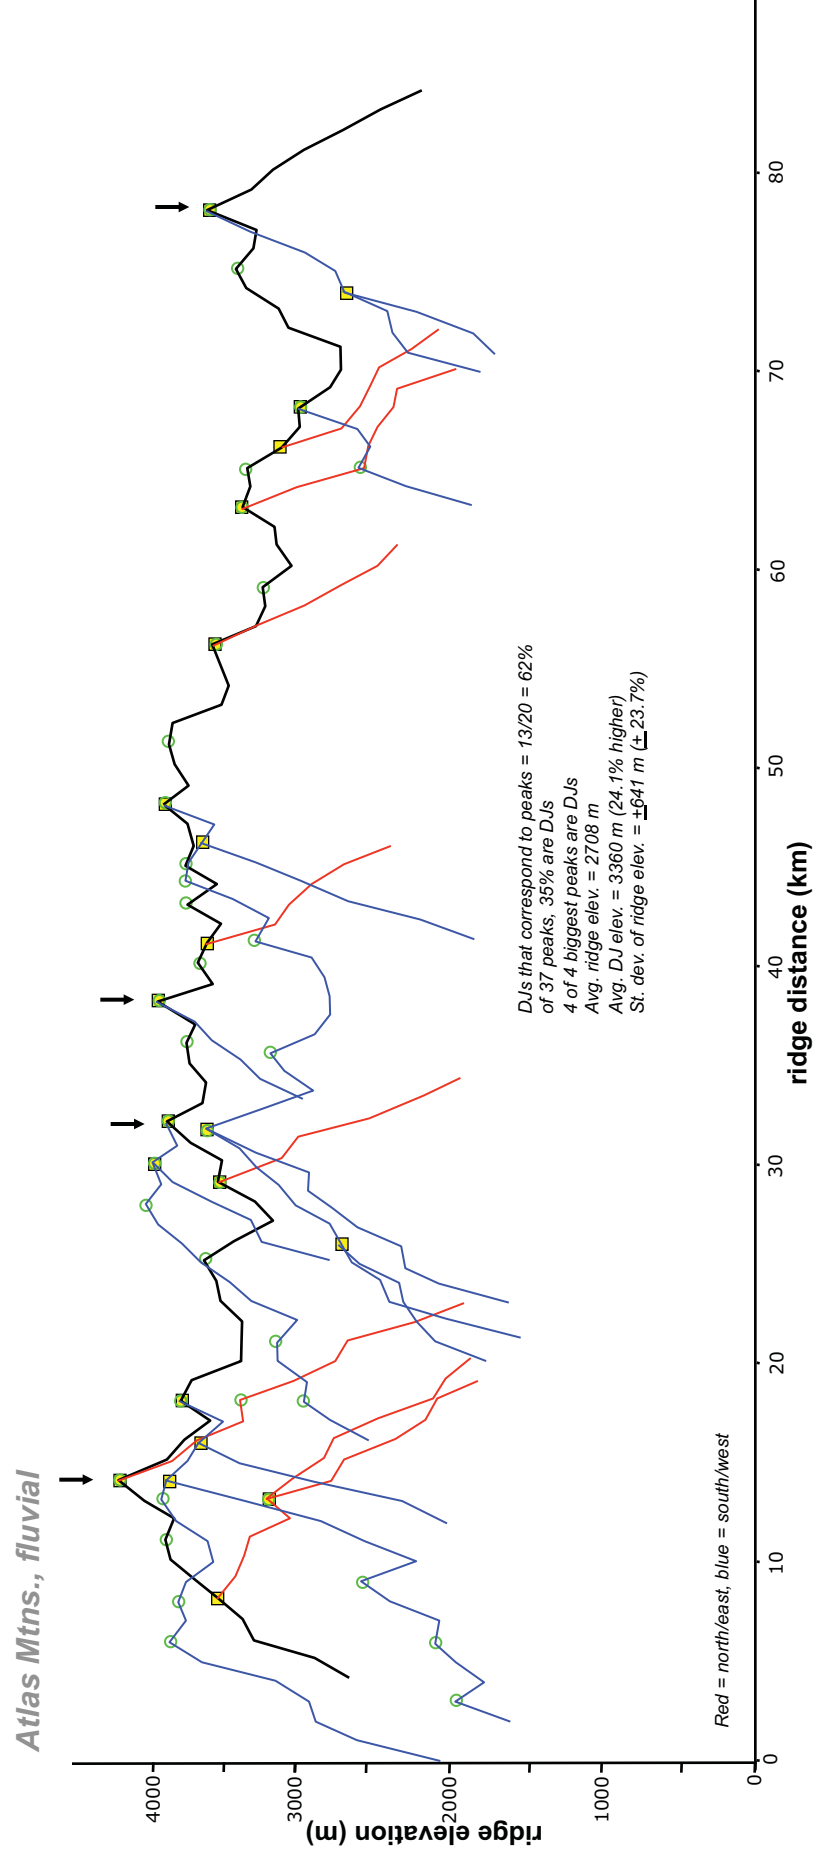

**Figure DR-5. cont.**

\*final statistics in Table 2 are weighted average of the two profiles.

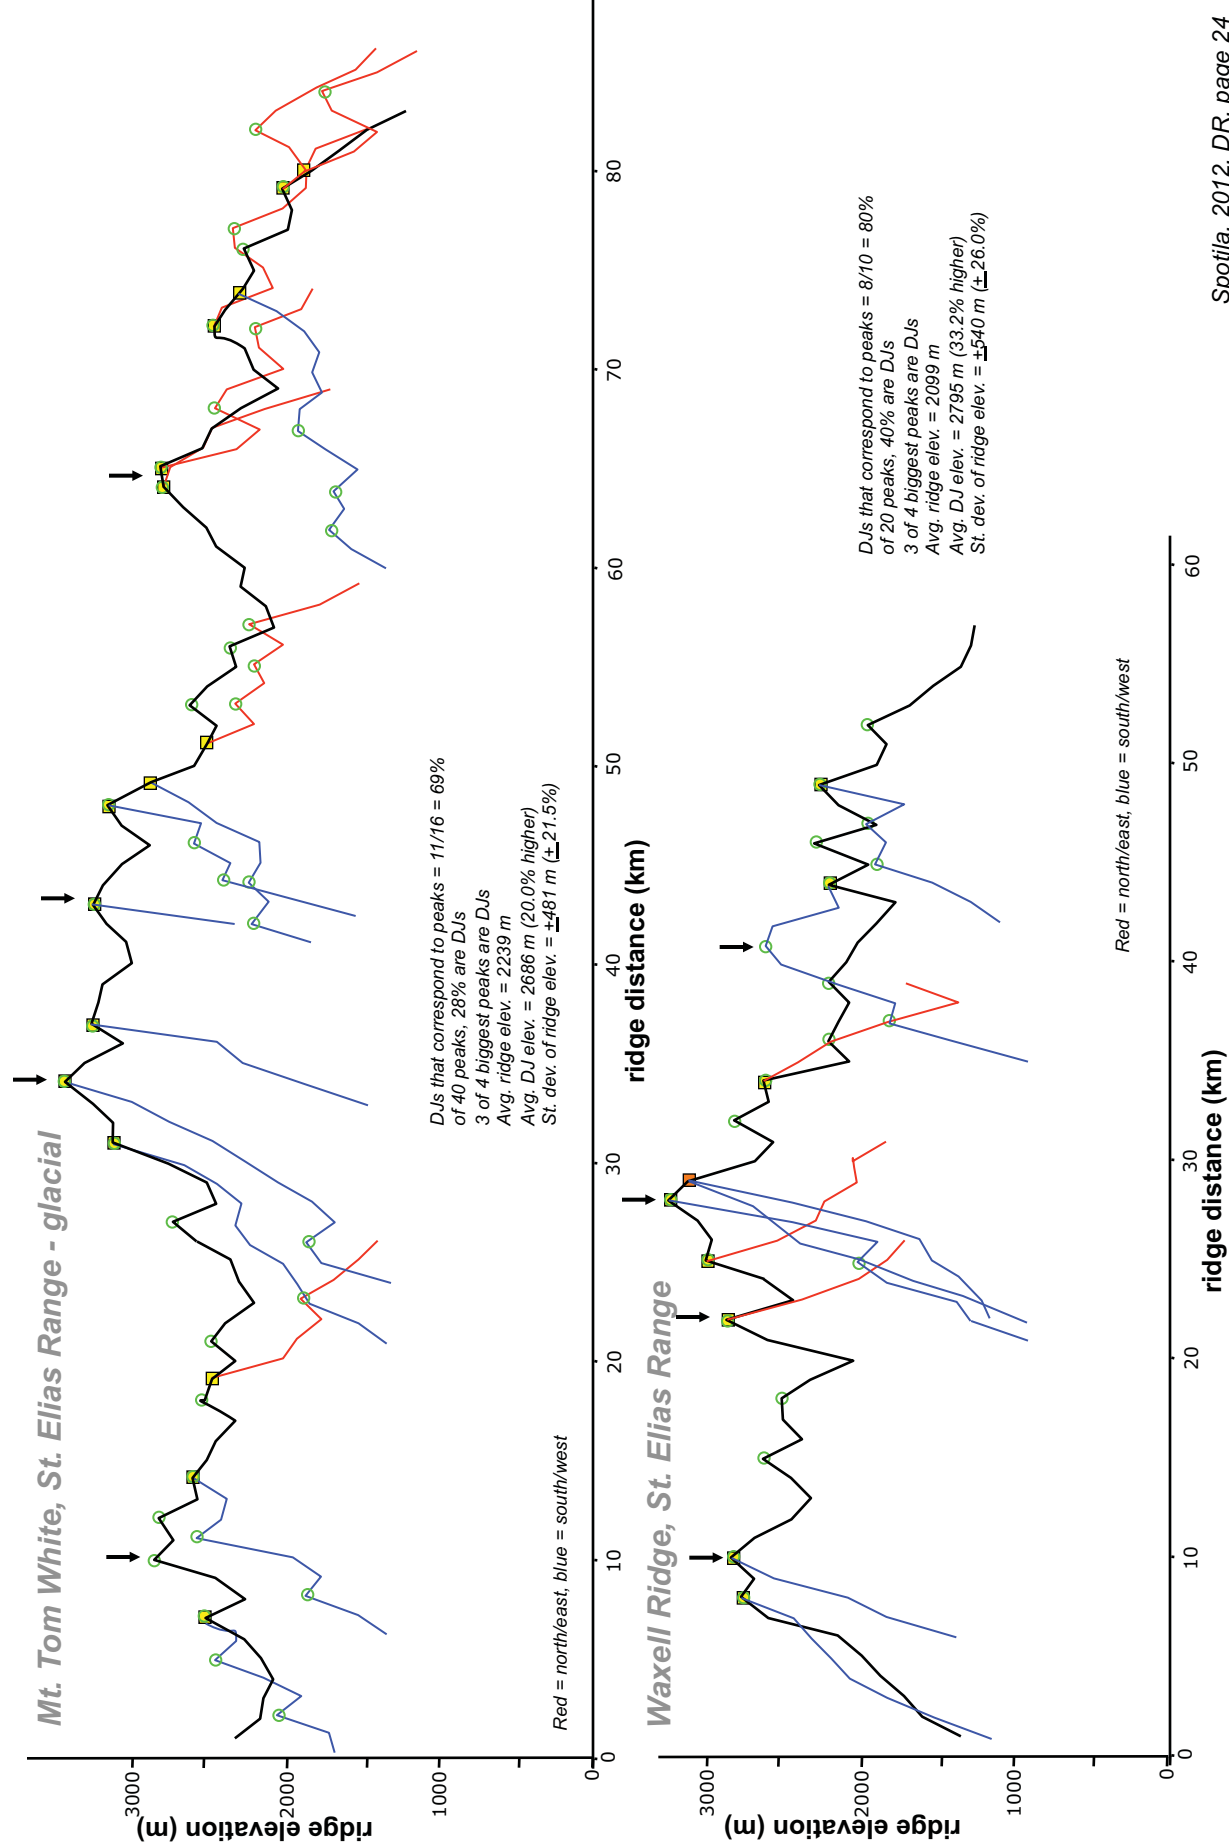

**Figure DR-5. cont.**

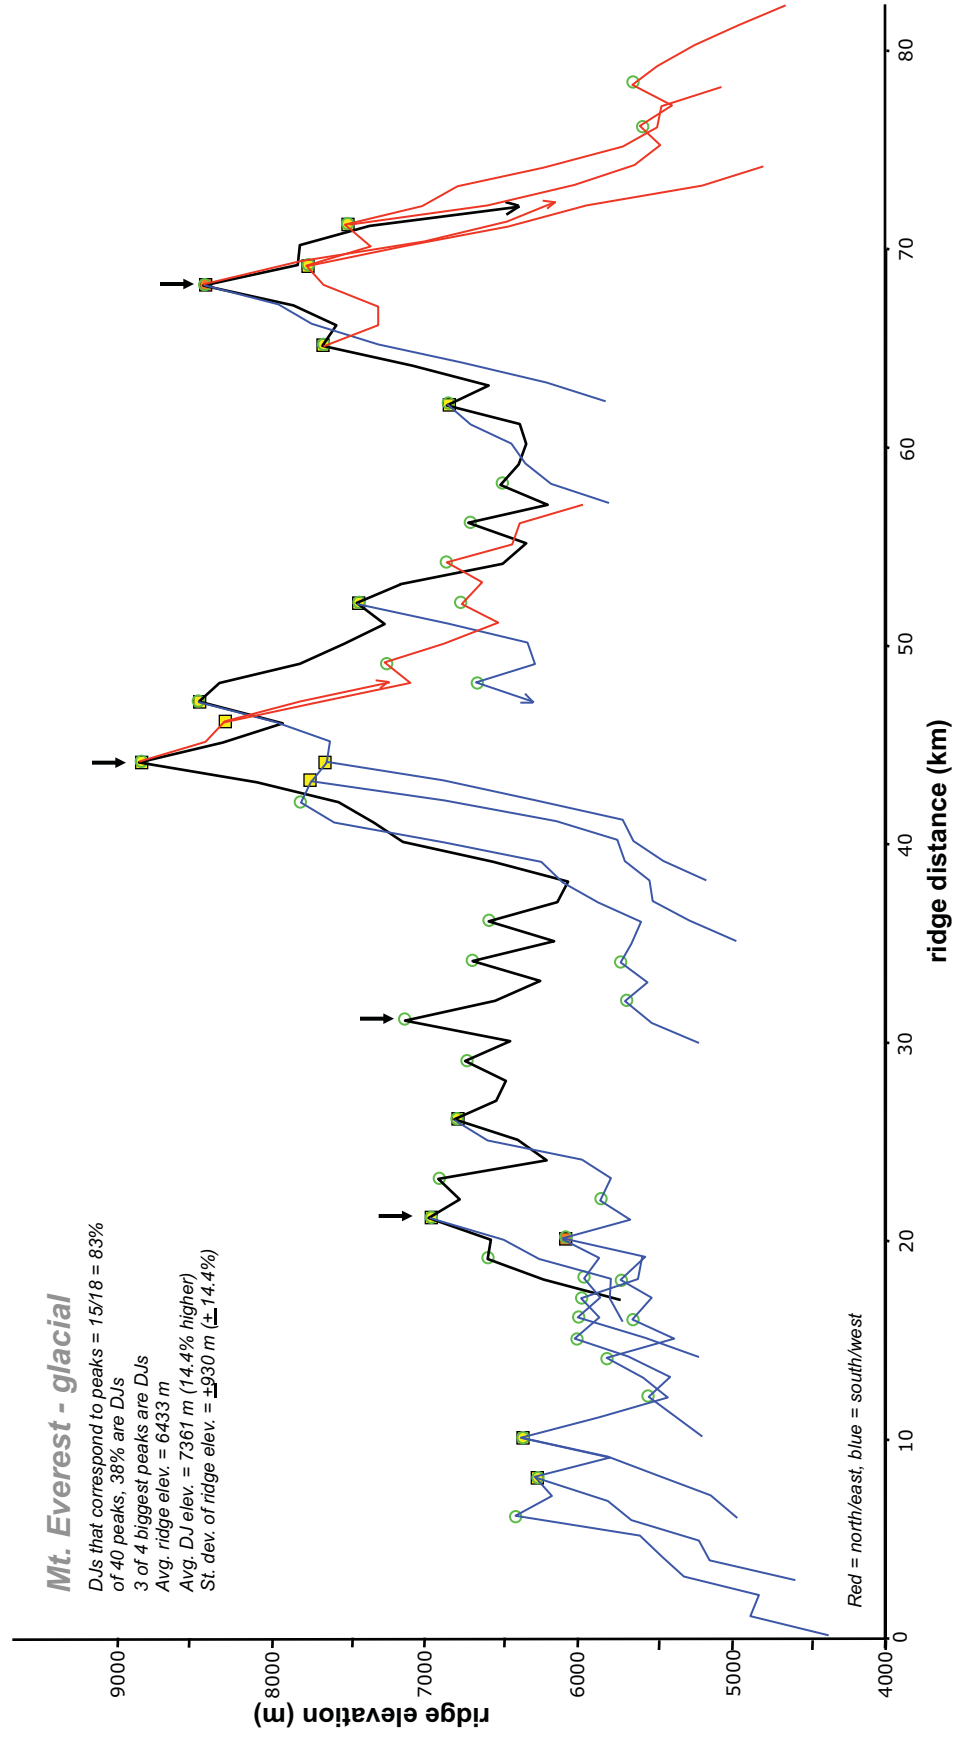

**Figure DR-5. cont.**

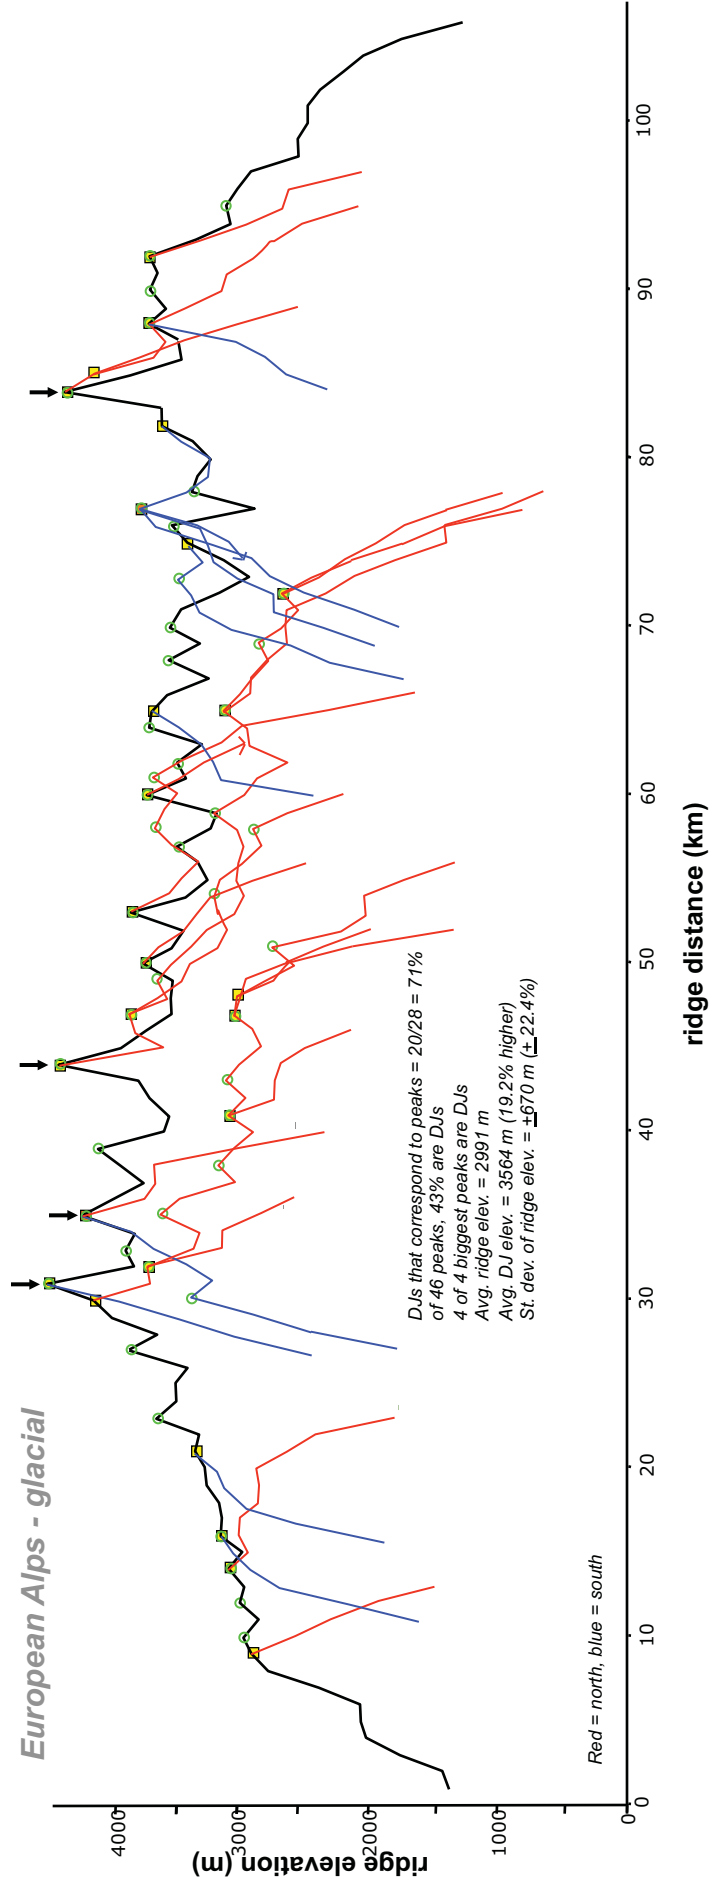

*\*plotted at a slightly smaller scale than the other 9 profiles, to fit onto one page*

**Figure DR-5. cont.**

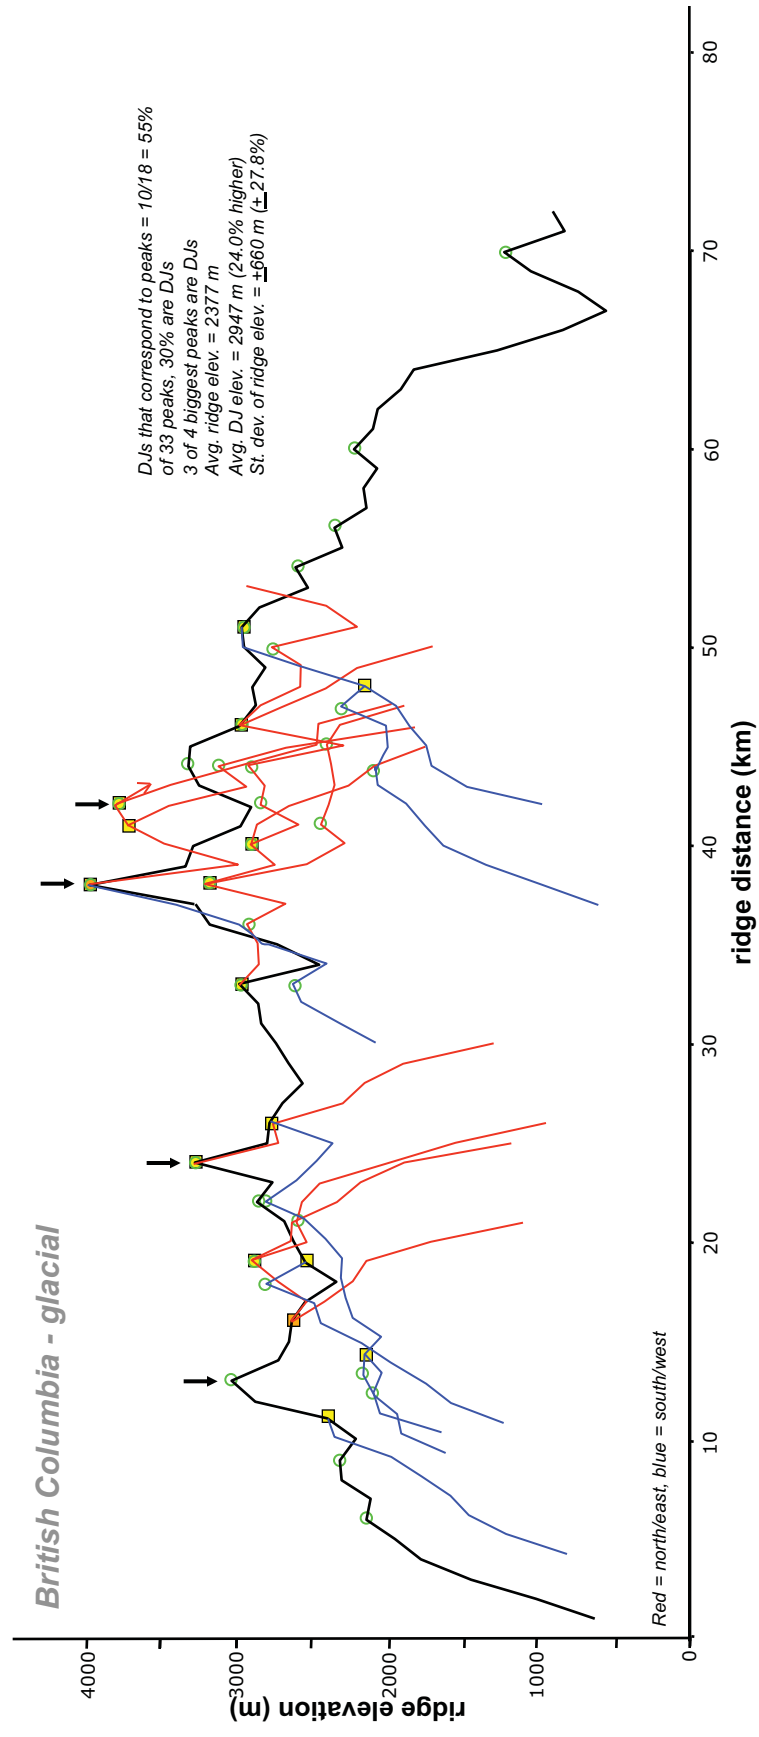

**Figure DR-5. cont.**

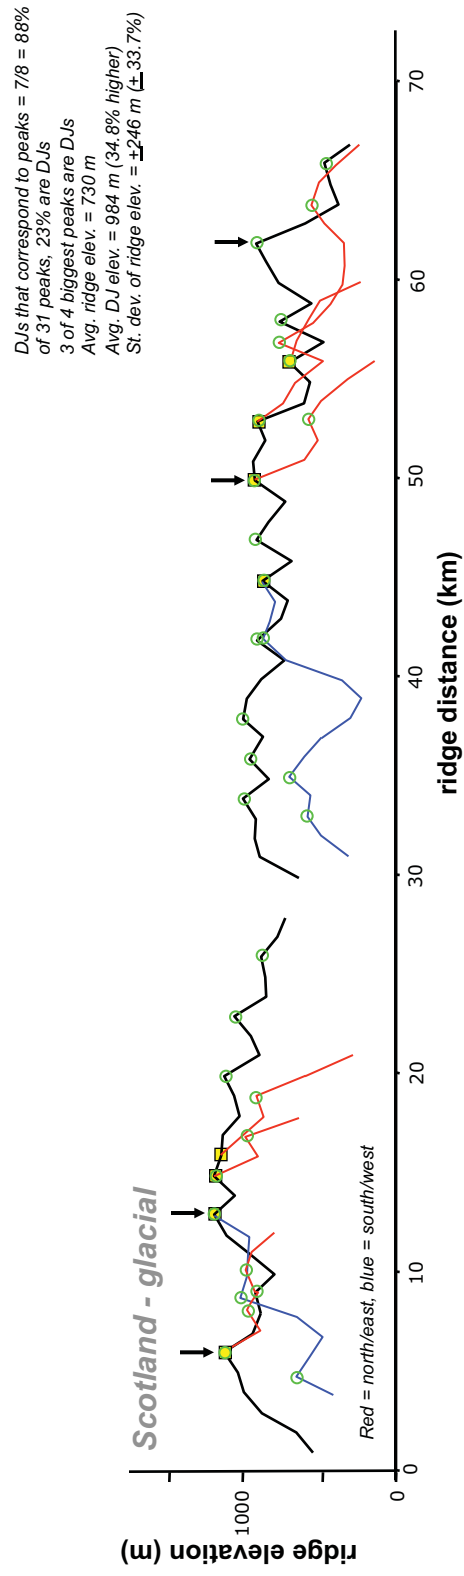

Supplement: Supplementary file 1 [file 23294114]
